# Supplementary material
Source: publisher figshare collection journal article supplement (https://tandf.figshare.com/articles/dataset/_/25212344)
Supplement: Supplementary file 1 [file 1]

## Sheet: Major and trace elements
Supplement. Whole-rock major- (wt %), trace- (ppm) and rare earth (ppm) element compositions of Early Carboniferous magmatic rocks in the Dananhu Arc.
No	Location	Rock type	SiO2	TiO2	Al2O3	TFe2O3	MgO	MnO	CaO	Na2O	K2O	P2O5	Na2O + K2O	LOI	A/CNK	A/NK	Mg#	V	Sc	Cr	Co	Ni	Cu	Ga	Rb	Ba	Th	U	Nb	Ta	La	Ce	Pr	Pb	Sr	Nd	Zr	Hf	Sm	Eu	Gd	Tb	Dy	Y	Ho	Er	Tm	Yb	Lu
Middle segment
1	Qi’eshan Group	andesite	58.51	0.66	14.62	5.78967	2.12		6.88	2.13	1.32	0.41	3.45	7.24	0.836961	2.96159	42.0368	141	13.2	45.5	13.1	17.4			52.2	196	3.84	1.4	3.27	0.28	9.33	22.67	3.04		257	13.55	157	4.38	3.2	0.77	3.59	0.54	3.3	19.2	0.68	1.94	0.28	1.86	0.28
2	Qi’eshan Group	basalt	53.85	0.82	16.44	9.33831	3.99	0.11	9.54	1.87	0.08	0.41	1.95	3.61	0.800402	5.19717	45.8362	181	17.9	122	29.4	81.1			0.41	52	0.53	0.18	1.68	0.17	5.71	14.08	1.98		782	9.6	64	1.73	2.39	0.98	2.77	0.39	2.32	13.4	0.49	1.35	0.18	1.22	0.17
3	Qi’eshan Group	basalt	50.8	1.07	19.11	8.51946	4.02		9.31	2.82	0.44	0.6	3.26	3.26	0.865713	3.73475	48.3088	194	19.5	115	28.3	98.6	384	18.9	8.56	180	1.45	0.44	3.56	0.23	17.19	41.95	5.83		806	26.99	108	2.57	5.75	1.83	5.1	0.64	3.32	17.2	0.64	1.62	0.21	1.32	0.2
4	Qi’eshan Group	basalt	50.65	1.1	19.37	8.53177	4.71		9.18	2.91	0.09	0.68	3	2.82	0.896519	3.96514	52.2307	191	20.4	127	31.7	94.3			1.16	107	0.68	0.26	2.43	0.19	7.42	18.03	2.48		712	11.9	82	2.04	3	1.11	3.55	0.47	2.78	16	0.57	1.56	0.22	1.38	0.21
5	Qi’eshan Group	basalt	50.26	1.02	19	11.3504	5.32		4.33	2.82	0.06	0.26	2.88		1.50898	4.03872	48.1412								12	40	1		3.4	1.6	7.99	18.19	3.07		571	13.85	85	2.7	3.52	1.06	3.46	0.61	3.45		0.71	1.72	0.25	1.61	0.27
6	Qi’eshan Group	basalt	47.55	0.93	19.01	8.38936	4.46		3.46	4.3	2.47	0.18	6.77		1.18394	1.94886	51.2893								7.7	6720	2		3.8	0.8	7.83	17.26	2.48		898	13.83	92	2.6	3.19	1.13	3.59	0.57	2.99		0.58	1.54	0.22	1.51	0.24
7	Qi’eshan Group	basalt	48.07	0.96	19.28	8.68379	4.62		3.61	4.39	2.41	0.16	6.8		1.1747	1.95987	51.308								21	81	1.4		4.1	4.3	7.31	14.7	2.27		315	10.43	159	3.3	2.75	0.92	3	0.5	2.89		0.58	1.45	0.21	1.41	0.23
8	Qi’eshan Group	basalt	50.79	0.97	17.96	8.03049	6.1		5.77	3.2	0.15	0.24	3.35		1.12694	3.30921	60.0714								4.3	81	1.4		33	2.9	7.59	16.29	2.66		496	12.73	106	2.9	3.39	1.16	3.56	0.6	3.28		0.64	1.6	0.23	1.46	0.24
9	Qi’eshan Group	andesite	57.78	0.74	17.92	7.77	3.96		5.7	3.53	0.73	0.15	4.26	1.28	1.05525	2.71534	50.2343								13.06	234.1	0.61	0.27	1.65	0.1	8.05	18.69	2.45	5.23	354.8	11.98	49.16	1.48	3.1	0.85	3.83	0.64	4.13	23.69	0.89	2.7	0.39	2.47	0.37
10	Qi’eshan Group	basalt	47.75	0.92	19.16	10.4	6.21		9.95	2.62	0.67	0.08	3.29	1.51	0.827268	3.80359	54.184								5.75	191.3	0.4	0.22	1.86	0.12	3.78	10.43	1.57	11.32	355.9	8.33	52.5	1.6	2.5	0.95	3.06	0.53	3.49	16.27	0.73	2.19	0.32	2.07	0.31
11	Qi’eshan Group	andesite	53.23	0.99	16.25	9.48986	5.38	0.04	7.87	3.39	0.12	0.22	3.51	3.2	0.810799	2.84723	52.8933								0.55	127	0.83	0.24	4.11	0.23	8.43	19.8	2.91		655	13.6	125	3.09	3.25	1.25	3.16	0.56	3.46	15.8	0.67	1.92	0.32	1.92	0.33
12	Qi’eshan Group	andesite	54.94	1.03	15.33	9.3592	5.6	0.08	4.78	5.2	0.81	0.17	6.01	2.63	0.845084	1.62501	54.2349								15.5	367	0.9	0.27	2.69	0.15	9.05	21.8	3.12		847	14	133	3.33	3.21	1.23	3.2	0.54	3.29	15.4	0.64	1.8	0.3	1.94	0.31
13	Qi’eshan Group	andesite	54.24	0.9	15.7	9.43543	5.93	0.06	5.53	3.96	0.19	0.21	4.15	3.93	0.934885	2.33596	55.452								3.19	198	1.52	0.45	3.36	0.19	11.9	26.5	3.75		957	16.4	146	3.74	3.65	1.19	3.41	0.58	3.55	16.4	0.7	2.02	0.33	2.08	0.33
14	Qi’eshan Group	andesite	52.81	0.98	16.02	8.93657	6.23	0.02	8.33	3.37	0.13	0.25	3.5	3.1	0.76806	2.81781	57.9963								0.44	127	0.76	0.22	3.69	0.22	7.9	18.6	2.71		661	12.4	117	3.1	3.11	1.16	2.84	0.49	3.14	14.6	0.63	1.78	0.3	1.78	0.3
15	Qi’eshan Group	basalt	46.92	1.73	15.42	12.3442	7.18	0.04	7.95	3.86	0.2	0.67	4.06	3.86	0.732622	2.34798	53.5319								3.28	157	1.37	0.47	5.67	0.31	21.1	50.8	7.54		1156	33.1	234	5.53	7.05	2.47	6.39	1.03	6.04	27.3	1.17	3.3	0.53	3.15	0.53
16	Qi’eshan Group	andesite	61.42	1.16	13.53	8.16782	2.22	0.11	4.31	5.61	0.08	0.41	5.69	3.18	0.788162	1.45231	34.9941			3.48	8.22	1.91			1.19	45.6	2.14	0.67	3.9	0.22	12.8	31.8	4.85		347	22.3	190	5.23	5.38	1.51	5.36	0.94	5.86	28.7	1.19	3.5	0.6	3.57	0.63
17	Qi’eshan Group	andesite	51.24	0.98	18.87	8.61463	4.46		7.18	1.99	0.98	0.16	2.97	5.7	1.08354	4.35066	50.6271			53.2	27.1	49.5			20.9	103	0.85	0.36	1.73	0.16	7.43	15.7	2.17		492	10.5	66	2.07	2.71	0.78	2.67	0.49	2.18	13.8	0.48	1.43	0.22	1.3	0.19
18	Qi’eshan Group	andesite	53.06	0.89	17.63	9.62349	5.04	0.09	6.61	2.27	0.53	0.16	2.8	4.34	1.07834	4.09085	50.9148			57	39	50.9			12.4	117	0.78	0.38	1.47	0.13	6.41	14.6	2		893	9.7	79.9	2.16	2.51	0.83	2.42	0.45	2.48	13.1	0.42	1.33	0.17	1.39	0.17
19	Qi’eshan Group	andesite	53.86	1.13	15.73	7.75737	5.5	0.03	7.77	5.05	0.04	0.21	5.09	2.9	0.698988	1.8835	58.4069			14.8	26.6	37			0.204	49	0.65	0.24	2.38	0.14	8.78	21	3.02		1095	13.7	128	3.29	3.22	1.14	2.87	0.48	2.81	13.3	0.56	1.5	0.25	1.5	0.25
20	Qi’eshan Group	basalt	47.84	0.92	19.88	10.59	6.06	0.11	9.71	2.37	0.67	0.08	3.04	1.31	0.890995	4.2974	53.1258	126	10.2		10.6		115	12	31.3	586	9.02	3.37	3.4	0.09	9.54	30.1	3.34	30.2	215	15	169	4.89	3.56	0.81	3.81	0.6	3.75	18.4	0.78	2.36	0.35	2.37	0.36
21	Qi’eshan Group	andesite	52.18	1.08	16.07	8.38	5.43	0.03	7.06	5.22	0.24	0.333	5.46	2.77	0.740299	1.8162	56.2051			235	35.2	172		20.6	1.1	130	0.7	0.3	3.7	0.23	9.4	23.1	3.38		854	14.5	81.2	2.3	3.62	1.22	3.89	0.59	3.4	17	0.69	1.81	0.24	1.51	0.21
22	Qi’eshan Group	andesite	52.7	1.03	16.34	8.01	5.46	0.04	7.9	4.86	0.24	0.292	5.1	2.82	0.721566	1.97919	57.448			211	34.1	157		21.1	1	110	0.6	0.3	3.5	0.21	8.2	20.6	2.93		918	12.7	77.1	2.1	3.15	1.11	3.53	0.52	3.13	15.8	0.62	1.67	0.22	1.4	0.19
23	Qi’eshan Group	basalt	49.63	1.13	17.08	8.32	6.42	0.07	7.68	3.8	0.87	0.359	4.67	3.48	0.80626	2.37365	60.4477			144	27.3	101.5		22.1	9.1	180	0.9	0.4	4.4	0.26	13.9	33.3	4.68		901	19.2	92.8	2.7	4.18	1.35	4.12	0.59	3.42	16.7	0.67	1.75	0.23	1.5	0.19
24	Qi’eshan Group	basalt	50.06	1.11	17.04	8.12	6.38	0.06	8.22	3.53	0.86	0.37	4.39	3.7	0.784792	2.52796	60.8791			143	27.6	100		21.7	10.9	190	1	0.4	4.4	0.25	13.5	32.3	4.59		835	18.7	96.5	2.7	4.15	1.28	3.91	0.57	3.3	17.3	0.65	1.7	0.22	1.43	0.18
25	Qi’eshan Group	andesite	53.97	0.94	16.94	6.795	4.54	0.577	6.76	4.56	0.07	0.26	4.63	4.79	0.851652	2.23545	56.958								2.41	298	2.08		2.86	0.22	15.2	37	4.95		1666	20.3	120	2.97	4.26	1.35	3.78	0.57	3.18	16.7	0.62	1.67	0.24	1.6	0.24
26	Qi’eshan Group	andesite	57.63	0.97	14.64	6.065	6.8	1.11	5	3.9	1.8	0.23	5.7	2.22	0.837698	1.74925	68.95								29.1	374	3.22		5.7		14.9	28.6			260	16.9	165	2.98	4	1.35	3.93	0.64		18.1				1.91	0.302
27	Qi’eshan Group	basalt	47.7	1.02	19.19	10.226	6.56	0.499	7.62	2.65	0.1	0.33	2.75	4.57	1.04592	4.29481	55.9579								2	133	0.32	0.13	3.2	0.24	7.4	21.2	3.2		442	15.1	125	2.9	3.8	1.5	4.6		4.6	24.3	0.96	2.6		2.2	0.36
28	Qi’eshan Group	andesite	61.68	0.89	16.47	6.5818	1.66	0.043	2.34	3.54	3.18	0.14	6.72	2.98	1.2167	1.77584	33.3123	115	29.2	34	12.9	14.1			84.5	725	3.25		5.85	0.28	18.6	39.8	6.79		1860	30	168	5.28	7.61	2.31	6.54	1.14	7.91	28.8	1.54	4.58	0.69	4.36	0.52
29	Qi’eshan Group	andesite	53.39	1.34	15.46	11.0937	3.58	0.043	7.12	2.82	2.14	0.26	4.96	2.66	0.775713	2.22079	38.9928	376	42.6	7	30.6	9.5			36.3	716	1.63		3.47	0.29	15	28	4.7		683	21	96.1	3.31	5.7	1.6	5.4	0.9	6.2	24.3	1.3	3.6	0.5	3.1	0.4
30	Qi’eshan Group	andesite	51.02	1.14	18.22	8.93604	4.07	0.045	5.66	4.84	2.55	0.29	7.39	2.7	0.866015	1.69811	47.426	274	32.4	39.4	26.5	23			43.3	1090	2.87		4.13	0.31	19	33.8	5.29		841	25	110	3.63	5.81	1.64	4.78	0.8	5.18	19	0.87	2.73	0.38	2.14	0.26
31	Qi’eshan Group	andesite	61.4	0.79	16.45	5.40186	2.47	0.034	2.62	4.13	3.89	0.23	8.02	2.16	1.04195	1.49334	47.5238	101	13	36.2	16.1	34.7			81.7	978	5.51		10.1	0.18	29.4	51.1	6.28		577	29.7	184	5.57	6.1	1.36	4.81	0.8	4.99	20.9	0.83	2.71	0.4	2.48	0.31
32	Qi’eshan Group	andesite	47.86	1.16	16.73	10.837	6.03	0.037	9.78	1.98	0.947	0.374	2.927	4.04	0.757062	3.9043	52.4274	260	31.5	154	39.6	87.6			17.1	248	0.66		4.89	0.5	16.9	31.6	4.8		700	23.5	109	3.81	5.82	1.75	4.8	0.74	4.86	18.6	1.02	2.79	0.42	2.09	0.28
33	Qi’eshan Group	andesite	55.18	0.81	16.01	7.03172	5.82	0.032	7.88	3.09	0.12	0.18	3.21	3.02	0.81823	3.07072	62.1111	158	26.6	142	29.1	81.6			3.6	98.9	2.68		4.66	0.43	16.3	29	4.25		701	17.7	138	4.55	4.58	1.28	3.9	0.68	4.42	17.9	0.95	2.63	0.4	2.22	0.28
34	Qi’eshan Group	andesite	62.53	1.06	17.89	7.23753	3.73		1.63	3.28	1.24	0.11	4.52	1.68	1.84232	2.65365	50.5131							15.2	89.7	1228			4.83	0.8	9.62	23.1	3.07		294	13.2	140	3.46	2.76	0.87	2.58	0.34	2.12	11.6	0.45	1.45	0.21	1.6	0.25
35	Qi’eshan Group	basalt	52.24	1.07	17.05	8.1822	5.35	0.05	8.23	2.99	1.44	0.26	4.43	3	0.79406	2.63053	56.4275			118					26.3	2262			6.13	2.52	16.8	40.2	5.27		828	22.8	162	4.19	4.68	1.79	4.42	0.64	3.62	19.1	0.71	2.09	0.29	2.06	0.29
36	Qi’eshan Group	basalt	50.02	1.03	18.63	9.01808	7.51		6.45	2.78	1.21	0.17	3.99	3.33	1.05644	3.16485	62.2554			134		105			11.4	2353			4.13	0.75	14.3	28.9	4.07		664	18.1	103	2.81	4.08	1.75	4.09	0.61	3.67	19.4	0.73	2.14	0.29	2.07	0.29
37	Qi’eshan Group	andesite	63.1	0.83	16.12	6.0467	1.63		4.4	3.85	2.15	0.28	6	1.63	0.966361	1.85996	34.807	104	14	7.44	11.4	5.06	24.5	18.7	14.8	688	2.88	0.93	6.7	0.46	15.8	37.1	5.28	7.25	372	23	164	4.57	5.68	1.53	5.76	0.9	6	33.5	1.3	3.69	0.6	4.12	0.7
38	Qi’eshan Group	andesite	62.95	0.83	16.05	6.1985	1.73		4.28	4.14	2.1	0.29	6.24	1.47	0.950525	1.76574	35.5995	101	9.82	17.7	11.5	9.08	32	17.1	5.35	486	2.11	0.85	6.25	0.4	10.4	27.3	4.01	6.14	274	18.1	150	4.23	4.57	1.28	4.83	0.8	5.03	26.5	1.09	3.19	0.53	3.68	0.61
39	Qi’eshan Group	andesite	63.21	0.79	16	5.9323	1.67		4.26	3.73	2.4	0.27	6.13	1.6	0.969697	1.83052	35.7969	106	20.2	27	10.8	10.6	25.7	17.5	55.9	596	3.05	0.97	6.4	0.45	18.2	39.3	5.34	5.81	445	23.3	149	4.18	5.23	1.35	5.46	0.88	5.6	27.4	1.22	3.43	0.54	3.52	0.59
40	Qi’eshan Group	andesite	62.86	0.84	16.05	6.0797	1.75	0.03	4.13	4.13	2.19	0.28	6.32	1.71	0.961458	1.7501	36.3098	110	22.5	6.73	11.2	5.68	24.7	18.3	57.2	659	2.9	1.05	6.33	0.43	17.6	40.6	5.39	5.79	477	23.6	154	4	5.35	1.44	5.77	0.92	5.71	28.9	1.2	3.45	0.55	3.55	0.58
41	Qi’eshan Group	andesite	62.94	0.83	16.07	6.0302	1.74	0.02	4.3	4.03	2.22	0.29	6.25	1.61	0.952518	1.77786	36.3664	103	4.55	8.9	11.9	7.61	5	17	1.75	360	0.76	0.8	6.12	0.36	4.63	13.5	2.12	5.41	248	10.5	158	4.38	3.08	0.84	3.5	0.59	3.89	15	0.86	2.6	0.44	3	0.51
42	Qi’eshan Group	andesite	65.64	0.8	15.49	5.5088	1.62	0.14	2.76	5.14	1.6	0.26	6.74	1.09	1.01778	1.51977	36.8066	16.2	6.25	8.58	2.57	5.24	26.7	17	10.8	746	2.64	1.11	10.1	0.59	12.2	31.2	4.6	8.82	140	20.2	267	7.14	5.04	1.33	5.18	0.89	5.56	6	1.22	3.62	0.6	4.26	0.71
43	Qi’eshan Group	basaltic andesite	53.12	1.51	17	10.0001	4.48	0.02	4.95	4.26	1.01	0.3	5.27		0.992967	2.09764	47.0142	180	13	55	29.6	46	41.8	18	8.83	294	2.91	0.86	7.2	0.44	13.2	33.6	4.81	8.8	731	21.2	156	4.05	5.33	1.44	5.15	0.83	5.01	26.3	1	2.86	0.45	3.07	0.49
44	Qi’eshan Group	basaltic andesite	54.11	0.92	17.7	7.964	4.94	0.03	5.14	2.41	3.09	0.31	5.5		1.06115	2.41875	55.1277	173	13.8	120	27.6	82.6	34.7	16.6	36.4	1010	1.19	0.42	4.47	0.26	12.5	30.9	4.31	3.97	602	19	132	3.14	4.35	1.28	4.06	0.64	3.78	20	0.77	2.13	0.33	2.15	0.35
45	Qi’eshan Group	basalt	49.38	1.48	17.35	10.1101	4.48	2.49	7.19	3.74	0.22	0.45	3.96		0.890305	2.71449	46.7418	232	16.9	93.5	32.4	65.7	47.3	17.5	3.57	182	1.02	0.52	7.04	0.47	18.6	44.6	6.27	7.82	953	26.1	164	3.86	5.97	1.6	5.64	0.85	4.83	24.5	0.93	2.62	0.41	2.67	0.42
46	Qi’eshan Group	basalt	48.69	1.57	18.33	10.3246	4.75	0.06	6.98	3.15	0.22	0.47	3.37		1.01078	3.38131	47.677	245	8.07	93.8	35.2	69.6	83.7	18.5	2.58	121	0.96	0.41	7.69	0.4	16	41.8	5.86	7.44	791	25.1	180	4.2	5.86	1.7	5.62	0.88	4.98	25.3	1.01	2.78	0.42	2.87	0.45
47	Qi’eshan Group	basalt	51.48	1.4	17.6	9.8153	4.81	3.55	7	3.7	0.61	0.48	4.31		0.90261	2.60779	49.2538	217	12.6	114	34	76.5	79.3	17.5	7.44	354	0.86	0.34	6.85	0.37	15.6	41.7	5.86	4.97	824	24.2	160	3.68	5.51	1.62	5.21	0.8	4.54	23.5	0.87	2.49	0.38	2.67	0.42
48	Qi’eshan Group	basalt	48.29	1.57	17.82	11.0638	6.11	3.12	6.87	3.6	0.34	0.31	3.94		0.947634	2.83239	52.2396	248	7.15	77.6	41	81.4	74.5	17.1	4.63	220	0.49	0.25	4.96	0.28	9.28	26.2	3.83	4.41	849	16.5	119	2.93	4.23	1.18	4.15	0.65	3.75	17.3	0.75	2.06	0.31	2.06	0.32
49	Qi’eshan Group	basalt	48.05	1.45	18.24	10.7228	6.01	4.01	6.55	3.87	0.71	0.47	4.58		0.956599	2.55562	52.6089	224	4.52	113	38.5	82.7	59.2	17.6	8.28	300	0.43	0.33	6.68	0.34	13.5	36.6	5.24	4.98	799	22.4	164	3.79	5.24	1.49	4.82	0.76	4.43	19.3	0.87	2.43	0.37	2.46	0.4
50	Qi’eshan Group	basalt	48.72	1.1	20.55	9.8461	5.62	0.07	6.16	3.66	0.14	0.26	3.8		1.1815	3.3289	53.0625	214	5.99	105	28.6	87.2	33.6	17.6	1.09	86.2	0.61	0.2	4.76	0.26	7.39	19.6	2.81	4.26	833	12.5	98.8	2.44	3.2	1.16	3.44	0.55	3.24	16.5	0.66	1.89	0.28	1.93	0.31
51	Qi’eshan Group	basalt	47.1	1.51	18.12	11.4609	6.58	0.06	6.62	3.45	0.37	0.41	3.82		0.999164	2.98159	53.2078	231	5.08	96.2	39.8	86	63.7	18.2	1.91	170	0.3	0.27	6.52	0.38	9.46	27.2	4.08	6.17	553	17.2	157	3.63	3.94	1.1	3.71	0.56	3.08	7.98	0.58	1.55	0.22	1.36	0.2
52	Qi’eshan Group	basalt	52.4	1.02	19.11	8.7197	5.06	0.05	6.76	3.5	0.17	0.24	3.67		1.04681	3.2158	53.4739	188	14.2	96.4	31.3	82.2	49	18.4	1.48	135	0.65	0.24	3.85	0.26	7.46	19.4	2.85	2.22	812	12.6	84.3	2.16	3.22	1.1	3.3	0.52	3.14	16.8	0.64	1.8	0.27	1.81	0.28
53	Qi’eshan Group	basalt	48.16	1.58	18.21	10.7536	6.39	0.07	6.71	3.47	0.34	0.31	3.81		0.995113	2.99623	54.0633	249	9.04	76.7	38.9	75.5	77.4	18.2	4.36	195	0.5	0.23	4.82	0.3	9.72	26.5	3.98	3.47	778	16.8	117	2.85	4.25	1.24	4.18	0.64	3.76	17.6	0.75	2.15	0.32	2.11	0.32
54	Qi’eshan Group	basalt	52.64	0.88	18.46	8.3094	5.21	0.12	3.78	6.05	0.2	0.28	6.25		1.08236	1.8151	55.3937	155	7.43	91.2	24.1	70.9	42.9	17	1.28	130	0.92	0.39	3.57	0.2	8.93	23.3	3.44	2.53	788	15.1	108	2.71	3.66	1.15	3.69	0.58	3.5	18.7	0.71	2.02	0.32	2.11	0.33
55	Qi’eshan Group	basalt	49.62	1.57	17.09	10.0914	6.41	0.2	7.61	3.05	0.14	0.51	3.19		0.898021	3.30583	55.7142	232	9.03	212	40.7	87.7	65.5	18.8	1.46	116	0.83	0.46	4.97	0.27	18.5	50.6	7.6	3.02	805	33.7	167	4.23	6.85	1.88	5.92	0.88	4.74	20.7	0.91	2.55	0.38	2.54	0.41
56	Qi’eshan Group	basalt	52.59	0.97	17.81	8.5019	5.56	0.13	7.52	3.36	0.34	0.25	3.7		0.90896	3.02034	56.4318	198	12.9	106	31.6	98.6	49.8	17	4.11	201	0.55	0.24	2.84	0.18	6.41	18.1	2.72	4.26	674	12.6	83.8	2.1	3.17	1.07	3.14	0.5	2.96	15	0.58	1.61	0.24	1.63	0.26
57	Tuwu	plagiogranite porphyry	80.73	0.19	12.03	0.559972	0.07	0.05	0.11	2.73	2.14	0.06	4.87	1.43	1.7152	1.76563	19.8452			16.6	4.94	6.8			21.8	586	1.226	0.205	2.21	0.117	7.71	15.5	1.83	6.12	714	7.19	37	1.09	1.27	0.6	1.19	0.143	0.924	5.23	0.179	0.51	0.07	0.58	0.07
58	Tuwu	plagiogranite porphyry	71.83	0.1	14.77	3.39983	0.7		0.3	5.2	1.32	0.09	6.52	2.8	1.40218	1.4789	28.9667								16.1	341	1.47		3.9	0.263	12.7	22.5		5.98	226	9.73	69.9	2.55	1.75	0.56	1.75	0.29		6.7				0.87	0.15
59	Tuwu	plagiogranite porphyry	67.5	0.24	14.8	1.73991	0.75		3.4	4.21	0.97	0.12	5.18	5.06	1.04435	1.85494	46.0552														8.79	16.71	1.97	5.58		9.21			1.34	0.62	1.54	0.25	1.19		0.23	0.75	0.1	0.67	0.11
60	Tuwu	plagiogranite porphyry	70.65	0.28	15.57	2.35988	1.06		0.9	7.36	0.94	0.11	8.3	2.04	1.05433	1.18598	47.0797			6.2	3.7	12			5.2	109	1.1	0.3	3.2	0.7	8.91	16.53	2.56	5.7	279	10.84	156	3.3	1.59	0.66	1.29	0.3	0.98	4.96	0.2	0.58	0.1	0.65	0.1
61	Tuwu	plagiogranite porphyry	64.34	0.47	17.71	4.45978	2.2		2.3	4.6	1.93	0.2	6.53	1.56	1.27858	1.83295	49.4189			15.7	6.1	2.7			28.1	394	0.75		2.7	0.185	10.3	18.6		6.19	405	10.1	100	1.75	2.3	0.75	1.96	0.28		7.9				0.84	0.14
62	Tuwu	plagiogranite porphyry	72.28	0.21	12.32	2.67987	1.33	0.08	1.45	3.42	1.91	0.11	5.33	2	1.19148	1.60021	49.5702														5.17	10.52	1.04	20.52		4.19			0.85	0.38	0.86	0.13	0.7		0.14	0.38	0.06	0.38	0.07
63	Tuwu	plagiogranite porphyry	70.32	0.26	16.15	1.19994	0.82	0.03	1.1	5.24	2.05	0.08	7.29	2.47	1.25694	1.48915	57.5096			15.7	3	2.63			35	850	1.428	0.191	2.72	0.441	7.38	15.1	1.79	6.21	347	6.83	15.6	0.588	1.21	0.594	1.05	0.13	0.833	4.42	0.149	0.44	0.06	0.41	0.05
64	Tuwu	plagiogranite porphyry	65.32	0.26	15.43	0.79996	0.73	0.02	5.62	1.74	1.39	0.13	3.13	6.37	1.05632	3.53018	64.3796														8.55	17.69	2.36	7		9.61			1.76	0.47	1.34	0.2	1.12		0.23	0.67	0.11	0.72	0.12
65	Tuwu	plagiogranite porphyry	68.21	0.37	17.08	1.19994	1.35	0.03	1.56	4.89	2	0.12	6.89	2.52	1.30816	1.67204	69.0238			15.7	6.06	2.7			46.6	1483	1.6	0.41	3.15	0.321	11.4	23.5	2.78	9.23	619	11	41.9	1.23	1.93	0.808	1.6	0.199	1.11	6.17	0.211	0.59	0.08	0.59	0.08
66	Tuwu	plagiogranite porphyry	69.35	0.71	15.66	0.339983	0.55		2.77	4.15	2.11	0.13	6.26	3.22	1.10575	1.71767	76.2135														14.46	22.84	2.69	5.92		9.35			1.78	0.52	1.47	0.22	1.26		0.25	0.74	0.12	0.79	0.13
67	Tuwu	plagiogranite porphyry	68.72	0.27	16.25	1.77909	0.46		3.38	3.71	1.8	0.14	5.51	3.33	1.14331	2.01694	33.8669			8.83		6.74	204	16.7	28.8	395	1.19	0.48	2.38	0.2	10.1	19.7	2.48		397	9.63	55.2	1.66	1.69	0.73	1.46	0.23	1.08	7.2	0.26	0.67	0.12	0.82	0.13
68	Tuwu	plagiogranite porphyry	68.73	0.25	14.84	2.16363	0.64		4.06	4.25	1.38	0.12	5.63	3.58	0.934251	1.74807	36.9427			3.12		4.36	3253	11.7	25	245	1.38	0.58	2.58	0.25	12.9	25.8	3.14		462	11.2	49.3	1.74	2.17	0.72	1.89	0.26	1.43	8.47	0.29	0.81	0.14	0.94	0.16
69	Tuwu	plagiogranite porphyry	67.45	0.23	14.22	2.56931	1.14		4.34	4.97	1.22	0.1	6.19	3.76	0.816993	1.4968	46.7742			3.49		4.81	940	19.7	23.5	271	1.53	0.39	2.26	0.22	13.7	27.6	2.88		586	11.7	46.3	1.3	2.38	0.89	1.82	0.3	1.49	9.45	0.28	0.86	0.14	1.06	0.14
70	Tuwu	plagiogranite porphyry	69.75	0.18	15.5	2.29227	0.577		3.06	4.04	1.6	0.12	5.64	2.77	1.11062	1.84906	33.2687			5.52	5.89	3.31			25.6	487	1.12	0.77	2.6	0.25	10.7	21	2.64		661	10.1	39.4	1.26	1.42	0.78	1.19	0.21	1.2	5.8	0.19	0.59	0.12	0.64	0.09
71	Tuwu	plagiogranite porphyry	68.84	0.25	15.76	2.20806	1.11		2.59	4.27	2.18	0.1	6.45	2.72	1.11711	1.67832	49.891			9.67	3.43	7.03			36.7	466	1.52	0.68	2.68	0.27	9.3	19.1	2.29		429	9	57.1	1.61	1.66	0.71	1.44	0.2	1.31	7.35	0.21	0.69	0.16	0.82	0.13
72	Tuwu	plagiogranite porphyry	71.5	0.19	14.65	0.862407	0.499		3	4.4	1.44	0.08	5.84	3.31	1.02695	1.66453	53.4016			4.64	1.06	2.32			27.3	315	1.24	1.41	2.63	0.33	12	23.3	2.93		264	10.4	28.4	1.15	1.58	0.51	1.46	0.2	1.1	6.54	0.22	0.64	0.11	0.73	0.12
73	Tuwu	tonalite	65.3	0.36	16.1	0.84	1.68		2.22	2.98	2.09	0.15	5.07	3.61	1.4357	2.24533	79.8435	68.8	7.11	8.83	21.5	6.74	204	16.7	49.1	461	1.44	0.97	2.41	0.2	14.8	29.3	3.73	5	566	15.3	53.6	1.82	2.71	0.88	2.23	0.35	1.96	9.53	0.36	1.1	0.16	1.15	0.18
74	Tuwu	tonalite	66.7	0.31	15.5	0.69	1.38		2.31	3.64	1.61	0.15	5.25	3.24	1.29784	2.00377	79.8435	46.5	4.7	31.7	28.4	6.62	249	13.4	32.5	339	1.45	0.81	2.33	0.19	13.4	26.5	3.35	5.52	608	13.6	43.6	1.51	2.47	0.67	1.98	0.31	1.63	8.08	0.29	0.9	0.14	0.88	0.13
75	Tuwu	tonalite	66.9	0.31	15.7	0.645	1.29		2.53	3.15	1.85	0.14	5	3.12	1.33074	2.18368	79.8435	52.6	4.76	6.39	26.2	4.37	1102	13.8	39.5	426	1.39	0.71	2.18	0.19	10.7	21.6	2.7	8.79	669	11.6	41.5	1.52	2.15	0.74	1.88	0.31	1.71	8.18	0.31	0.95	0.14	0.93	0.14
76	Tuwu	tonalite	68	0.31	15.6	0.65	1.3		1.74	3.4	2.4	0.14	5.8	2.87	1.37238	1.90295	79.8435	27.7	4.51	6.66	31.1	10.2	356	11.4	56.3	433	1.59	0.92	2.49	0.22	10.9	22.5	2.42	15.5	261	11.2	43	1.5	1.95	0.62	1.55	0.26	1.43	7.51	0.27	0.87	0.14	0.84	0.13
77	Tuwu	tonalite	68.2	0.29	15.7	0.6	1.2		2.47	4.65	1.28	0.13	5.93	2.38	1.15971	1.73693	79.8435	43.1	4.75	6.84	26.8	5.33	95.7	10.9	27.3	281	1.26	1.04	2.25	0.2	11.1	22.2	2.73	18.3	509	10.9	38.1	1.3	2.07	0.67	1.68	0.27	1.49	8	0.28	0.88	0.13	0.87	0.12
78	Tuwu	tonalite	66.4	0.33	16.8	0.725	1.45		1.67	3	2.49	0.13	5.49	3.26	1.57315	2.1997	79.8435	19.7	5.14	6.48	21.9	6.46	97.3	13.3	53.6	440	1.35	0.96	2.36	0.22	14.1	27.4	3.31	4.54	559	13.7	45.2	1.65	2.47	0.78	1.89	0.31	1.69	8.72	0.32	0.94	0.15	1	0.15
79	Tuwu	plagiogranite porphyry						0.07										165	19.3	132	5.33	64.7	659	14.4
80	Tuwu	andesite																200	24.6	80.6	25.8	80.1	540	18.9
81	Tuwu	andesite																183	19.9	114	32.7	1220	1240	16.3
82	Tuwu	plagiogranite porphyry																31.8	5.19	6.6	23	6.97	116	14.4
83	Tuwu	plagiogranite porphyry																60.3	7.18	4.59	5.92	17.1	7437	11.7
84	Tuwu	plagiogranite porphyry	65.07	0.31	15.93	3.23	1.11		3.17	2.92	1.77	0.14	4.69	4.61	1.27456	2.36895	40.4988			7	6.5	4		17.3	33.8	350	1.2	0.4	2.3	0.17	7.3	16.45	2.17		511	8.4	36.3	1.1	1.73	0.52	1.5	0.19	0.98	4.8	0.19	0.55	0.08	0.64	0.11
85	Tuwu	plagiogranite porphyry	73.05	0.34	14.24	2.88915	1.17		0.3	3.45	1.13	0.37	4.58	2.5	1.91182	2.06318	44.5082			11.9		8.14			23	272			3.05	0.28	9.94	20.1	2.33		397	8.69	74.3	2	1.45	0.42	1.1	0.17	0.92	6.03	0.19	0.6	0.09	0.69	0.11
86	Tuwu	plagiogranite porphyry	64.92	1.23	16.42	4.74726	2.16		3.49	3.35	1.78	0.55	5.13	0.91	1.18989	2.20616	47.4008								18.5	554			8.39	0.56	16.5	36.1	4.44		920	18.8	146	3.53	3.86	1.28	3.8	0.5	2.82	16	0.57	1.58	0.21	1.4	0.21
87	Tuwu	plagiogranite porphyry	70.62	0.29	17.03	1.73577	0.97		1.11	4.73	2.14	0.06	6.87	1.41	1.40448	1.68551	52.535			16.6		6.8			21.8	586			2.21	0.12	7.71	15.5	1.83		714	7.19	37	1.09	1.27	0.6	1.19	0.16	0.92	5.23	0.18	0.51	0.07	0.48	0.07
88	Tuwu	plagiogranite porphyry	69.76	0.4	15.89	2.26693	1.28		1.22	4.93	1.56	0.3	6.49	2.3	1.32135	1.62086	52.7929			17.9	12.8				11.5	458			2.18	0.21	7.33	15.2	1.77		421	6.86	86.7	2.29	1.39	0.54	1.25	0.19	1.06	6.3	0.22	0.65	0.11	0.7	0.12
89	Yandong	plagiogranite porphyry	66.79	0.37	16.32	5.6	0.52	0.02	0.68	0.62	3.49	0.14	4.11	4.87	2.69949	3.39503	15.5343	84.4	8.37	13.7	16.7	10.3	1839	19.1	61.8	423	2.03	1.28	2.81	0.242	14.1	26.8	3.48		184	14.7	83.2	2.44	2.77	0.682	2.06	0.339	1.54	9.36	0.306	0.888	0.151	0.963	0.143
90	Yandong	plagiogranite porphyry	65.74	0.38	16.32	4.5	1.42	0.02	1.81	0.74	2.89	0.12	3.63	6.01	2.13329	3.74881	38.4611	86.9	10.6	12.7	10.6	9.54	456	17.4	55.8	388	2.56	1.06	2.54	0.308	14.4	31.4	4.12		283	17.7	92.9	2.57	3.99	1.24	3.58	0.574	2.87	13.5	0.486	1.26	0.194	1.18	0.17
91	Yandong	plagiogranite porphyry	74.4	0.18	12.57	1.97	0.84	0.13	3.41	0.4	3.1	0.11	3.5	2.76	1.22838	3.12539	45.7853	16.4	3.36	3.53	6.39	3.26	3930	11.1	45.3	536	1.06	0.396	3.25	0.229	10.4	20	2.34		582	8.6	29.6	0.937	1.48	0.432	0.999	0.14	0.778	3.68	0.137	0.383	0.06	0.44	0.072
92	Yandong	plagiogranite porphyry	69	0.3	15.48	3.14	1.36	0.17	0.93	4.58	1.97	0.12	6.55	2.98	1.36191	1.60041	46.174	60	7.84	7.97	7.87	7.52	36.1	14.8	38.8	423	1.39	0.589	2.71	0.426	8.35	18.3	2.36		285	9.47	83.7	2.22	1.86	0.461	1.55	0.234	1.39	6.8	0.248	0.759	0.129	0.768	0.13
93	Yandong	plagiogranite porphyry	65.21	0.3	14.51	3.25	1.49	0.14	4.22	3.73	1.89	0.11	5.62	4.86	0.914089	1.77226	47.5898	59.8	7	10.7	8.48	9.5	15.6	14.5	39.7	371	1.31	0.554	2.58	0.339	11	23	2.93		352	11.6	76.9	2.11	2.27	0.659	1.92	0.283	1.65	8.31	0.288	0.807	0.128	0.807	0.125
94	Yandong	tonalite	66.91	0.302	15.07	0.585	1.17	0.23	3.98	0.965	3.37	0.115	4.335	4.62	1.20621	2.87355	79.8435	51.1	5.84	33.8	6.76	30.6	924	14.6	65.6	878	1.49	0.801	3.58	0.32	15.1	29.7	3.69	11	349	14.8	37.1	1.25	2.68	0.84	2.25	0.371	1.96	10.2	0.366	1.09	0.161	1.1	0.165
95	Yandong	tonalite	64.52	0.343	15.41	1.155	2.31	0.15	3.82	3.32	1.85	0.128	5.17	3.94	1.06812	2.06309	79.8435	70.6	7.59	51.8	11.3	45	1532	15.3	37.8	476	1.71	1.21	3.64	0.331	17.8	34	4.16	4.33	447	16.9	41.2	1.39	2.94	1.05	2.36	0.388	2.11	10.8	0.387	1.15	0.179	1.19	0.177
96	Yandong	tonalite	66.79	0.329	15.49	0.7	1.4	0.23	3.37	3.93	2.13	0.114	6.06	3.32	1.03855	1.76489	79.8435	49.3	6.08	17.4	5.77	15.4	132	15.2	43.5	638	3.11	1.59	4.43	0.433	12.8	25.8	3.23	9.09	437	13.3	52.4	1.79	2.36	0.647	2.14	0.354	2.07	10.5	0.393	1.21	0.201	1.32	0.206
97	Yandong	tonalite	68.56	0.209	14.76	0.239	0.478	0.26	4.65	1.44	2.99	0.081	4.43	4.93	1.04806	2.62938	79.8435	27.1	2.99	5.7	2.96	9.07	1149	12.5	64.7	655	1.62	0.521	3.02	0.317	13.4	25.2	2.99	13.5	532	12.2	23.2	0.863	2.13	0.725	1.7	0.277	1.49	7.76	0.273	0.816	0.128	0.837	0.123
98	Yandong	tonalite	66.65	0.175	11.98	0.3945	0.789	0.13	8.47	0.613	2.83	0.121	3.443	5.56	0.614144	2.93675	79.8435	13.1	4.99	3.12	4.77	4.36	3253	11.7	36.7	511	6.04	0.78	2.41	0.278	58.4	108	11.7	12.3	1128	38.5	24.2	0.779	5.55	1.47	3.86	0.584	3.01	13.9	0.527	1.47	0.229	1.46	0.188
99	Yandong	diorite porphyry						0.16			2.56	0.155	2.56					126	17	13.2	16.4	12.3	45.4	16.4	57	614	1.19	0.541	2.19	0.285	7.66	15.3	1.85	1.4	129	7.4	39.3	1.22	1.32	0.408	1.01	0.157	0.905	4.71	0.173	0.464	0.085	0.562	0.091
100	Yandong	quartz porphyry						0.15			1.65	0.037	1.65					3.12	5.61	3.83	0.955	2.61	5.44	11.7	61.8	423	2.03	1.28	2.81	0.242	14.1	26.8	3.48	5.03	184	14.7	83.2	2.44	2.77	0.682	2.06	0.339	1.54	9.36	0.306	0.888	0.151	0.963	0.143
101	Yandong	quartz porphyry									3.48	0.057	3.48					23.2	11.1	2.37	9.35	4.86	3727	22.5	55.8	388	2.56	1.06	2.54	0.308	14.4	31.4	4.12	4.53	283	17.7	92.9	2.57	3.99	1.24	3.58	0.574	2.87	13.5	0.486	1.26	0.194	1.18	0.17
102	Yandong	quartz porphyry						0.16			1.73	0.04	1.73					2.63	5.52	2.73	0.796	1.64	8.39	11.7	38.8	423	1.39	0.589	2.71	0.426	8.35	18.3	2.36	7.96	285	9.47	83.7	2.22	1.86	0.461	1.55	0.234	1.39	6.8	0.248	0.759	0.129	0.768	0.13
103	Yandong	quartz porphyry						0.12			3.49	0.044	3.49					19.4	10.7	3.49	3.27	4.81	940	19.7	39.7	371	1.31	0.554	2.58	0.339	11	23	2.93	8.91	352	11.6	76.9	2.11	2.27	0.659	1.92	0.283	1.65	8.31	0.288	0.807	0.128	0.807	0.125
104	Yandong	quartz porphyry						0.12			3.41	0.042	3.41					17.8	10.3	2.49	7.5	4.45	1741	20.2
105	Yandong	tonalite	71.62	0.229	14.83	3.96	0.583		0.621	0.219	4.17	0.109	4.389	3.31	2.46497	3.03571	22.5759	31.7	3.56	4.65	14	8.39	4996	13.9	78	506	13.2	4.06	10.1	0.894	33.6	63.3	7.62	20.7	178	31.3	138	5.21	6.58	1.31	6.57	1.2	7.2	37.2	1.44	4.74	0.774	5.15	0.83
106	Yandong	plagiogranite porphyry											0					27.3	5.12	4.36	21.8	4.16	454	11.9
107	Yandong	diorite						0.22			0.99	0.357	0.99							64	27.1	62.1		21.5	7.2	400	0.5	0.2	3.6	0.21	8.2	21.5	2.93		659	12.6	64	1.9	3.14	1.05	3.62	0.56	3.33	17.3	0.68	1.83	0.25	1.58	0.22
108	Yandong	quartz albite porphyry						0.14			1.1	0.027	1.1							10	0.8	0.9		15.25	25.6	490	6.5	2	6.6	0.55	13.9	29.9	3.43		598	11.4	50.4	2.1	2.6	0.36	2.91	0.53	3.57	22.1	0.8	2.39	0.36	2.6	0.38
109	Yandong	quartz albite porphyry						0.19			1.32	0.03	1.32							13	1.3	1.3		15.55	29.1	610	7	2.1	6.8	0.56	16.6	34.5	3.92		839	13.2	51.8	2.2	2.95	0.36	3.25	0.59	3.77	23.5	0.82	2.52	0.37	2.69	0.4
110	Yandong	quartz albite porphyry						0.15			2.54	0.037	2.54							10	1.1	0.6		27.4	39.3	670	5.2	1.8	9.2	0.77	17.1	38.2	4.03		739	13.5	66.1	2.9	3.04	0.4	3.25	0.59	3.87	20.1	0.82	2.43	0.38	2.85	0.43
111	Yandong	quartz albite porphyry						0.09			1.28	0.029	1.28							15	0.7	0.6		13.8	28	650	6.7	2.1	6.6	0.56	16	33.7	3.89		853	13.1	51	2.2	2.92	0.33	3.04	0.55	3.57	22.3	0.78	2.36	0.35	2.58	0.39
112	Yandong	plagiogranite porphyry	64.93	0.29	15.21	2.98	1.25		3.67	3.49	2.62	0.11	6.11	4.58	0.996121	1.77178	45.3787			10	7.7	7.3		17.35	42.9	550	1.1	0.4	2.8	0.23	7.9	17.75	2.19		307	8.2	43	1.2	1.68	0.48	1.49	0.21	1.2	6.5	0.24	0.66	0.1	0.68	0.11
113	Yandong	plagiogranite porphyry	68.86	0.2	15.22	0.96	0.85	0.16	2.49	6.21	1.19	0.092	7.4	3.39	0.948695	1.32259	63.6846			9	1.7	6.3		14.7	24	280	1.1	0.6	1.7	0.12	10.4	20.5	2.39		584	8.3	28.6	0.7	1.51	0.5	1.26	0.18	1	6	0.2	0.54	0.08	0.56	0.09
114	Yandong	plagiogranite porphyry	68.76	0.38	15.89	3.78477	1.24	0.13	1.01	2.98	2.35	0.21	5.33	2.93	1.71003	2.13215	39.3535			184		109			9.79	605			2.74	0.21	6.73	16.37	2.25		347	10.5	73.8	1.89	2.6	1.01	2.88	0.41	2.38	13.3	0.49	1.38	0.19	1.27	0.2
115	Yandong	plagiogranite porphyry	70.12	0.27	15.59	2.27688	0.93	0.04	2.05	5.6	1.22	0.08	6.82	1.78	1.09245	1.47959	44.7202			45.9		34.2			17	786			1.44	0.16	6.28	14.4	1.93		738	8.58	37.4	1.06	2.04	0.78	2.07	0.29	1.7	8.94	0.34	0.96	0.13	0.85	0.11
116	Yandong	plagiogranite porphyry						0.11										70.6	13.7	17.1	14.7	8.5	8884	19.98	51.59	626.5	4.03	2.58	9.33	0.69	25.21	57.71	8.69	5.58	150.7	37.65	416.5	10.64	7.98	1.99	7.54	1.29	8.01	42.66	1.78	5	0.77	5.2	0.76
117	Yandong	plagiogranite porphyry						0.26										29.1	3.2	16.8	2.1	5.3	3609	14.47	47.41	739.91	0.95	0.51	2.93	0.24	8.98	17.57	2.16	20.52	152.74	7.52	75.4	2.01	1.33	0.47	1.18	0.16	0.85	6.21	0.18	0.52	0.1	0.63	0.09
118	Yandong	plagiogranite porphyry																58.3	2.9	4.6	8.8	6.6	32	14.91	20.85	217.41	1.42	0.5	3.04	0.27	11.96	25.44	3.12	6.12	563.36	12.19	78.17	2.33	2.35	0.63	1.83	0.28	1.51	8.26	0.29	0.77	0.11	0.77	0.13
119	Yandong	plagiogranite porphyry																62.2	5.7	4.3	8.8	6.2	32	15.58	22.84	235.72	1.44	0.52	3.09	0.28	11.37	24.01	3.04	6.19	610.79	11.92	86.86	2.6	2.27	0.64	1.91	0.28	1.58	8.66	0.31	0.83	0.13	0.83	0.14
120	Yandong	plagiogranite porphyry																59.4	4.6	5.5	8.9	6.8	35	15.2	20.57	201.76	1.38	0.49	3.01	0.27	9.89	24.51	2.82	6.21	574.08	10.85	78.49	2.32	2.21	0.61	1.72	0.27	1.47	8.11	0.29	0.79	0.12	0.8	0.12
121	Yandong	plagiogranite porphyry																71.3		7.1	8.3	8.4	68	17.87	32.42	352.9	1.86	0.65	3.59	0.33	13.62	28.52	3.56	9.23	697.01	13.88	93.33	2.8	2.8	0.78	2.19	0.32	1.77	9.75	0.34	0.94	0.14	0.93	0.15
122	Yandong	plagiogranite porphyry																55.2	5	5.1	7.7	7.8	28	15.04	22.42	234.07	1.37	0.49	3.02	0.27	11.13	23.22	2.85	5.7	588.79	11.16	82.86	2.42	2.18	0.59	1.7	0.25	1.4	7.93	0.27	0.74	0.11	0.74	0.12
123	Yandong	plagiogranite porphyry																63.1	4.1	4.4	8	6.6	25	15.7	23.6	239.27	1.25	0.54	3.1	0.29	10.44	22.2	2.78	5.92	595.37	11.01	75.78	2.33	2.17	0.62	1.73	0.26	1.43	8	0.28	0.76	0.11	0.77	0.12
124	Yandong	plagiogranite porphyry																59.3	5.7	4.5	8.3	6.8	26	16.05	23.08	235.62	1.82	0.58	3.17	0.27	13.81	28.34	3.48	5.98	622.04	13.54	77.49	2.29	2.48	0.63	1.86	0.27	1.46	8.07	0.28	0.75	0.11	0.77	0.12
125	Yandong	plagiogranite porphyry						0.2										55.2	4.3	4.7	8.4	7	60	14.77	17.25	162.3	1.23	0.5	3.03	0.28	9.8	21.09	2.6	7	594.18	10.21	75.37	2.29	2.03	0.56	1.62	0.25	1.36	7.33	0.26	0.72	0.11	0.72	0.11
126	Yandong	diorite porphyry						0.14			2.19	0.12	2.19							6.02	13.1	4.71			52.7	391	5.28	1.64	5.54	0.42	15.8	34.3	4.37	4.96	222	18.7	49.1	2.14	4.13	1.07	3.88	0.74	4.74	26.2	0.87	2.78	0.48	2.98	0.49
127	Yandong	diorite porphyry						0.2			2.85	0.21	2.85							5.25	6.54	3.98			68.7	455	6.44	2.56	5.02	0.42	19.9	46.5	6.34	7.6	234	25.3	388	10	5.54	1.19	4.45	0.82	4.77	25.6	0.88	2.84	0.5	2.95	0.48
128	Yandong	diorite porphyry						0.19			2.56	0.11	2.56							6.22	12.3	3.57			42.7	480	7.21	2	5	0.42	19	35.5	4.48	7.64	247	18.3	58.2	2.59	4.28	0.97	3.52	0.72	4.53	25.8	0.83	2.61	0.49	3.2	0.53
129	Yandong	diorite porphyry						0.16			2.13	0.2	2.13							4.44	8.12	3.69			49.3	366	6.84	2.3	4.89	0.45	20.9	45	6.22	4.27	269	28.5	382	10.2	5.39	1.3	4.49	0.84	4.61	25.7	0.8	2.51	0.5	2.72	0.42
130	Yandong	diorite porphyry						0.18			1.37	0.16	1.37							44.1	30.6	47.8			17.6	339	3.78	1.15	4.11	0.28	16.1	38	4.95	12.6	772	20.7	222	6.32	4.3	1.29	4.15	0.7	4.31	20.5	0.82	2.42	0.42	2.52	0.42
131	Yandong	diorite porphyry						0.21												7.98	12.7	8.61
132	Yandong	diorite porphyry						0.2												5.39	8.43	4.41
133	Yandong	diorite porphyry						0.22												6.22	12.3	3.57
134	Yandong	quartz diorite																		8.57	12.8	5.17
135	Yandong	quartz diorite						0.14												6.87	13.3	4.79
136	Yandong	quartz diorite						0.19												6.39	12.5	4.51
137	Yandong	quartz diorite						0.15												4.54	10.3	4.08
Western segment
1	Xiaorequanzi Formation	andesite	63.48	0.68	14.6	5.18858	1.97	0.13	3.14	4	0.46	0.19	4.46		1.187	2.21863	42.9221	325	10.6	47.3	10.7	15.3	15	17.8		509	2.8		7.8		12.11	14.25	3.39	13.8	4.7	18.65	159	4.8	2.76	0.79	2.42	0.35	2.18		0.46	1.57	0.18	1.32	0.23
2	Xiaorequanzi Formation	andesite	68.62	0.48	14.42	3.27872	1.23	0.11	2.1	3.28	3.74	0.11	7.02		1.5638	2.67229	42.6281	317	11.1	25.1	8	12.8	38.2	18.1		800	2.3		12.1		24.7	69.5	6.8	17.4	6.2	25.1	231	9.2	4.5	1.3	4.5	0.92	2.2		1.1	1.6	0.5	2.7	0.59
3	Xiaorequanzi Formation	tuff	68.22	0.52	12.82	4.31417	1.73	0.12	2.91	4	1.2	0.14	5.2		1.07903	1.94814	44.2657	151	8.1	1.3	3.4	2.3	11.8	13.6		312	2.5		3.7		10.57	26.78	3.23	9.5	3.2	18.37	125	3.1	3.02	0.85	3.37	0.59	3.66		0.82	2.8	0.3	3.25	0.39
4	Xiaorequanzi Formation	dioritic porphyrite	64.3	0.83	16.72	6.79404	2.18	0.08	3.53	3.64	0.56	0.19	4.2		1.34643	2.79207	38.8571	408	16.3	21	10.5	12.7	31	17.2		782	2.3		8.2		25.6	15.5	5.5	18.6	1.5	34.5	186	5.8	7.3	2.6	7.3	1.2	6.1		1	3.9	0.71	4	0.59
5	Xiaorequanzi Formation	basalt	52.14	1.13	18.36	10.1559	2.9	0.2	8.98	3.4	0.46	0.264	3.86		0.836447	3.28235	36.1249	350	32.3	17.3	16.4	15	105.6	20.4		248	8.4		27.8		13.4	31.7	6.2	7.7	6.4	25.7	250	0.46	5.9	2.7	6.2	1.7	6.4		1.7	4.4	0.8	3.6	0.66
6	Xiaorequanzi Formation	basalt	53.02	1.67	14.52	7.83174	3.26	0.16	7.35	3.94	1.31	0.55	5.25		0.730771	2.24007	45.1884	298	21.9	68.3	18.8	24.9	59	25.6		263	3.9		146		19.1	41.52	5.63	22.2	6.4	32.68	201	3.6	4.83	1.47	4.49	0.65	3.83		0.77	2.36	0.25	1.67	0.26
7	Xiaorequanzi Formation	basalt	46.98	1.22	15.55	9.12271	6.81	0.06	9.37	2.84	0.4	0.16	3.24		0.715303	3.32816	59.6529	197	7.3	18.7	6.7	11.7	19.7	23.1		728	3.6		9.6		11.1	31.9	4	19.7	8.7	17.2	361	12.9	3.8	1.8	4.2	0.83	3.5		0.98	2	0.36	2.2	0.36
8	Xiaorequanzi Formation	basalt	51.78	1.06	14.84	4.03751	7.33	0.06	8.76	2.32	1.2	0.08	3.52		0.750538	3.8881	78.2406	593	31	275	37.7	105	133.8	19.4		284	7.4		27.5		21.6	45.3	7.7	10	4.4	30.8	269	0.4	5.9	2.4	5.3	1.3	4.7		1.2	2.9	0.55	2.5	0.43
9	Xiaorequanzi Formation	dacite	76.2	0.27	10.77	2.47987	0.24	0.1	1.4	3.94	1.2	0.05	5.14		1.19244	1.66154	16.0849	179	10	40	9.9	19.2	17.3	15.2		136	2.3		13.2		22.77	26.87	6.95	18.2	8.3	36.19	307	4.3	5.86	0.76	6.3	0.94	7.32		1.57	5.51	0.33	3.34	0.77
10	Xiaorequanzi Formation	dacite	71.12	0.31	13.17	2.39539	0.77	0.1	1.23	4	1.36	0.09	5.36		1.49303	2.00132	38.9001	143	6.8	2.2	4	3.2	14.2	15.1		409	2.4		7.8		15.09	36.96	4.47	14.8	5.9	25.49	231	3.8	4.05	1.04	4.4	0.82	4.88		1.13	3.76	0.42	3.24	0.52
11	Xiaorequanzi Formation	dacite	72.54	0.18	12.41	1.75658	0.44	0.01	2.07	3.22	3.68	0.04	6.9		1.36858	2.34265	33.1601	180	5.2	22	7.9	13.8	53.3	14.3		1360	2.9		10.5		26.6	68.5	6.8	10.5	0.49	22.9	168	12.4	3.9	0.81	3.7	0.78	2		0.85	1.9	0.42	2.7	0.51
12	Xiaorequanzi Formation	dacite	73.24	0.41	14.07	1.69105	1.05	0.13	0.95	4	2.65	0.08	6.65		1.69294	2.13809	55.1526	159	12.5	20.1	6.9	13.1	35	17		457	2.1		11.2		16.2	47.2	5.1	7.8	1.8	19.1	164	9	3.7	1	3.5	0.8	3		0.96	2.2	0.48	3.1	0.58
13	Xiaorequanzi Formation	Rhyolite	74.3734	0.2042	9.98	2.81	0.06	0.03	0.57	1.6359	7.3002	0.0115	8.9361	2.82346	2.67594	3.70822	4.05744	108.291	13.972	56.543	16.6	32.125	38.786	17.802	31.839	812.055	4.674	1.471	5.2	0.438	18.265	40.547	5.187	8.903	582.795	20.966	151.408	4.074	4.639	1.472	4.146	0.698	4.149	20.952	0.859	2.295	0.332	2.095	0.326
14	Xiaorequanzi Formation	Rhyolite	78.7424	0.1867	8.95	2.54	0.08	0.08	0.33	3.0598	4.5136	0.0213	7.5734	0.753979	1.58831	1.77796	5.8718	4.769	1.172	0.919	0.258	2.471	5.419	18.587	85.778	579.9	5.13	1.133	8.99	0.677	26.22	79.987	9.639	14.39	37.176	42.055	446.356	11.947	10.104	2.096	9.485	1.845	11.944	59.307	2.524	7.098	1.036	6.751	1.043
15	Xiaorequanzi Formation	Rhyolite	75.12	0.2062	10.05	2.77	0.12	0.04	0.43	1.9957	7.1795	0.0135	9.1752	1.85736	2.47144	3.06099	7.90217	8.003	1.447	9.038	0.162	4.303	4.097	19.392	118.333	592.109	5.84	1.569	10.607	0.782	32.651	80.136	10.994	12.381	47.87	48.875	506.163	13.615	11.359	2.219	10.411	1.989	12.949	65.994	2.809	7.621	1.148	7.488	1.147
16	Xiaorequanzi Formation	trachy dacite	63.09	0.69	16.96	6.138	0.66	0.11	3.51	6	2.45	0.22	8.45	0.85	1.04278	1.71817	17.5575	67.64	12.79	9.18	8.81	0.05	36.14	39.99	41.12	443.6	6.81	2.28	0.86	0.51	23.88	47	6.78	17.47	430.5	31.35	150	4.43	6.85	2.2	7.35	1.15	5.49	21.6	1.09	3.37	0.43	3	0.46
17	Xiaorequanzi Formation	trachy dacite	63.46	0.68	16.97	6.149	1.13	0.08	2.62	5.61	2.9	0.22	8.51	0.87	1.21201	1.8387	26.6848	23.61	9.44	4.2	3.05	0.04	9.61	30.52	69.86	283.8	7.72	2.62	0.86	0.53	26.61	61.78	7.11	6.69	429	31.23	200.6	5.47	6.3	2.1	7.36	1.06	5.23	22.04	1.03	3.34	0.46	3.24	0.48
18	Xiaorequanzi Formation	trachy dacite	65.69	0.31	17.41	3.542	0.87	0.14	3.31	4.26	3.15	0.37	7.41	0.75	1.3354	2.48417	32.727	73.55	13.57	19.62	8.06	0.04	12.49	53.14	38.03	698.3	7.25	2.13	0.9	0.52	14.79	32.72	3.63	10.58	426.4	15.75	108.5	3.26	3.42	1.05	3.87	0.68	3.72	17.31	0.78	2.4	0.32	2.23	0.33
19	Xiaorequanzi Formation	trachyandensite	58.2	1	18.19	8.745	2.06	0.1	5.3	4.91	1.42	0.28	6.33	0.66	1.02587	2.25187	31.813	43.64	10.24	21.69	5.7	0.02	12.89	77.63	85.2	1190	7.71	2.15	0.88	0.48	12.83	28.57	3.3	13.66	468.4	14.52	101.8	3.23	3.41	1.09	3.58	0.62	3.39	13.6	0.63	2.04	0.27	2.05	0.29
20	Xiaorequanzi Formation	basaltic andesite	62.22	1.04	18.13	8.316	2.64	0.14	3.03	2.69	1.89	0.1	4.58	0.71	1.82313	4.09673	38.6036	49.68	12.67	4.63	6.72	0.05	32.09	94.46	38.02	1430	7.14	2.09	0.86	0.63	22.18	49.59	5.78	8.35	310.4	25.64	161.9	4.35	5.25	1.7	6.16	0.92	4.41	18.34	0.87	2.75	0.37	2.61	0.39
21	Xiaorequanzi Formation	basalt	51.95	1.31	18.57	12.672	3	0.12	6.44	4.13	1.67	0.46	5.8	0.77	1.00246	2.73309	31.9214	162.8	17.73	41.18	21.82	0.03	54.44	54.91	12.03	618.5	2.08	0.7	0.86	0.12	10.38	24.5	3.39	4.8	678.4	17.04	66.1	1.81	3.99	2.15	4.55	0.6	2.9	11.57	0.54	1.67	0.21	1.4	0.19
22	Xiaorequanzi Formation	trachybasalt	54.65	1.02	17.47	10.186	2.96	0.13	5.77	4.95	1.11	0.22	6.06	2.55	0.936569	2.14526	36.5301	138.1	8.16	14.23	17.11	0.03	24.01	40.31	34.44	750.9	5.09	1.77	0.85	0.33	15.67	34.68	4.08	9.15	615	18.54	87.93	2.6	3.79	1.11	3.94	0.6	2.86	11.52	0.55	1.73	0.23	1.54	0.23
23	Xiaorequanzi Formation	dacite	67.4	0.43	15.95	4.125	0.96	0.12	3.57	4.66	1.82	0.16	6.48	0.84	1.1257	2.08049	31.5508	135	8.99	9.37	15.04	0.03	12.66	43.66	31.49	308.7	4.87	1.81	0.85	0.34	14.92	33.98	3.98	8.72	314.7	18.21	88.2	2.69	3.79	1.12	3.91	0.6	2.9	11.69	0.55	1.78	0.23	1.53	0.24
24	Xiaorequanzi Formation	dacite	67.6	0.28	15.84	4.18	1	0.15	3.95	3.69	2.38	0.14	6.07	1.34	1.19409	2.60928	32.1494	41.78	18.51	40.27	6.88	0.03	41.74	56.41	85.61	550	9.2	2.73	0.87	0.54	15.13	29.98	3.12	13.91	327.7	12.88	99.07	3.17	2.68	0.79	2.85	0.51	2.9	12.7	0.62	1.95	0.27	1.96	0.29
25	Xiaorequanzi Formation	dacite	68.31	0.45	15.61	4.521	1.28	0.1	3.48	4	1.52	0.13	5.52	1.21	1.20828	2.37211	35.9283	139.4	15.49	33.71	17.9	0.04	73.4	30.71	52.77	723.7	5.09	1.73	0.84	0.34	14.58	33.29	3.91	9.05	229	18.34	90.36	2.7	3.79	1.13	4.05	0.63	3.06	11.5	0.58	1.81	0.22	1.64	0.24
26	Xiaorequanzi Formation	andesite	64.04	1.05	13.31	6.458	1.1	0.11	3.04	3.77	3.37	0.13	7.14		1.13379	2.14599	25.2257
27	Xiaorequanzi Formation	andesite	56.06	1.3	14.95	10.509	2.15	0.11	4.54	5.08	1.18	0.13	6.26		0.899156	1.78883	28.8359
28	Xiaorequanzi Formation	andesite																													14	31.1	3.54			17.2			4.08	1.27	4.94	0.69	3.84		0.77	2.01	0.3	1.89	0.21
29	Xiaorequanzi Formation	andesite																													11.9	27.6	3.66			18			4.52	1.14	6.02	0.89	4.99		1.08	2.79	0.43	2.63	0.45
30	Xiaorequanzi Formation	andesite																													13.5	29.4	3.43			16.1			4.12	1.29	5.75	0.77	4.57		0.91	2.49	0.39	2.33	0.31
31	Xiaorequanzi Formation	andesite																													22.6	50.6	6.52			29.3			6.8	1.81	7.95	1.28	6.66		1.35	3.63	0.54	3.43	0.52
32	Xiaorequanzi Formation	andesite																													18.1	41.1	5.33			25.1			6.05	1.53	7.6	1.2	6.46		1.35	7.33	0.56	3.61	0.58
33	Xiaorequanzi Formation	andesite																													16.9	37.7	5.06			23.5			5.67	1.48	6.9	1.08	6.03		1.25	3.4	0.52	3.17	0.55
34	Xiaorequanzi Formation	pyroxene andesite	68.62	0.45	13.45	5.903	0.59	0.09	2.51	4.39	3.82	0.13	8.21		1.14041	1.8623	16.5247
35	Xiaorequanzi Formation	Rhyolite																													14.8	33.4	4.51			20.7			2.78	0.55	6.66	1.19	6.65		1.31	3.54	0.56	3.27	0.45
36	Xiaorequanzi Formation	basalt	51.42	1.11	19.26	8.304	4.93	0.16	7.39	4.7	0.27	0.23	4.97		0.908807	2.49086	54.0411														14.9	45.9	3.98			22.9			4.48	1.27	3.63	0.65	4.28		0.78	2.23	0.33	1.94	0.22
37	Xiaorequanzi Formation	basalt											0																		7.5	18.4	2.73			15			4.24	1.57	6.08	0.86	4.92		1.14	2.71	0.38	2.54	0.39
38	Xiaorequanzi Formation	basalt											0																		11.8	31.1	4.54			24.4			6.6	2.15	8.88	1.27	7.44		1.53	4.24	0.63	3.98	0.11
39	Xiaorequanzi Formation	basalt	59.27	0.65	13.25	11.011	1.69	0.12	3.78	4.14	2.36	0.13	6.5		0.967438	1.94539	23.3121
40	Xiaorequanzi Formation	dacite	62.18	0.57	14.92	6.591	1.39	0.13	3.96	5.02	1.33	0.11	6.35		0.96435	1.80658	29.463
41	Xiaorequanzi Formation	dacite	60.79	1.1	14.99	8.23	1.87	0.14	6.16	3.71	2.2	0.15	5.91		0.865296	2.45595	31.0357
42	Xiaorequanzi Formation	dacite											0																		13.9	28.4	3.32			13.5			2.7	0.85	2.5	0.33	1.61		0.32	0.78	0.12	0.6	0.1
43	Xiaorequanzi Formation	trachybasalt	67.93	0.49	14.02	3.224	1.21	0.34	3.2	4.79	2.69	0.13	7.48	2.56	1.02269	1.77911	42.6388								16.4	574	3.7		6.4		9.73	25.32	5.06		1091	17.01	145	2.61	3.83	1.47	3.76	0.64	2.49	14.14	0.61	1.77	0.27	1.68	0.27
44	Xiaorequanzi Formation	basalt	69.93	0.65	14.17	3.442	0.56	0.22	2.41	5.33	1.59	0.09	6.92	2.33	1.07688	1.61597	24.3705								7.6	244	3.9		8.3		11.5	25.4	4.56		457	18.65	157	2.41	3.57	1.35	4.15	0.72	4.01	18.97	0.83	2.15	0.35	2.13	0.33
45	Xiaorequanzi Formation	basaltic andesite	50.78	1.19	17.59	9.648	4.55	0.31	8.3	2.91	1.39	0.3	4.3	3.52	0.883685	3.67421	48.295								4.9	299	4.6		7.7		10.2	23.65	4.31		816	17.22	141	2.51	3.69	1.32	3.77	0.66	3.53	17.52	0.78	2.23	0.36	2.22	0.35
46	Xiaorequanzi Formation	basaltic andesite	49.15	1.36	17.32	9.294	5.32	0.18	6.79	3.86	1.29	0.58	5.15	4.67	0.925321	2.72742	53.1334								26.1	418	4.2		5.5		16.79	29.89	5.11		673	21.49	113	2.14	4.02	1.39	3.78	0.62	3.17	14.61	0.65	1.78	0.28	1.71	0.25
47	Xiaorequanzi Formation	dacite											0																		30.3	67.1	7.4			36.6			8.31	1.75	8.72	1.38	8.23		1.76	4.76	0.72	4.65	0.85
48	Xiaorequanzi Formation	Rhyolite	74.55	0.23	13.19	2.26315	0.37	0.06	0.84	4.16		0.08	4.16	0.58	1.57514	1.92727	24.4602
49	Xiaorequanzi Formation	basalt	47.11	1.79	16.72	11.3806	5.88	0.2	7.91	3.06		0.53	3.06	3.18	0.860007	3.32129	50.576
50	Xiaorequanzi	gabbro-diorite	48.86	1.07	18.36	11.774	4.66	0.2	8.87	2.64	0.44	0.126	3.08	2.36	0.89564	4.22727	43.9429														6.9	13.1	2			11.3			2.2	1.5	2.6	0.07	3	22.4	0.61	1.8	0.16	1.9	0.29
51	Xiaorequanzi	Moyite	68.54	0.31	13.09	4.815	0.74	0.28	2.39	3.4	4.4	0.057	7.8	1.31	1.31601	2.3402	23.3358	22.9	19.5	7.5	3.5	5.5	78.3	13.4	64.8	626	0.39		9.5		20	36.8	6.9		152	23	321	7.9	4.2	1.1	4.4	0.81	5.1	41.2	1.3	3.7	0.57	3.9	0.62
52	Xiaorequanzi	dioritic porphyrite	51.88	0.5953	16.46	9.288	6.01	0.16	8.07	2.8	0.92	0.069	3.72	4.2	0.852612	3.57325	56.1708	190	33	71.1	28.7	32.5	121.8	22.1	30.9	314	0.31		20.4		8.6	16.3	2.2		412	11.6	184	6.3	1.9	0.99	2.4	0.02	2.8	21.1	0.55	1.5	0.07	1.8	0.27
53	Xiaorequanzi	monzogranite	74.7164	0.0304	12.84	0.95	0.05	0.04	0.36	5.3193	3.8506	0.0066	9.1699	1.56533	1.36497	1.46724	9.44013	0.016	0.21	9.709	0.04	7.448	2.272	28.646	174.263	3.198	11.965	1.77	36.455	4.161	4.591	18.699	2.85	36.372	10.376	14.664	140.907	9.307	6.366	0.133	6.583	1.824	14.316	85.286	3.295	9.631	1.573	10.489	1.665
54	Xiaorequanzi	monzogranite	74.9283	0.0319	12.88	0.98	0.07	0.1	0.32	5.1586	3.8645	0.0056	9.0231	1.32843	1.42013	1.51766	12.3937	1.475	0.307	5.585	0.077	1.763	1.381	31.507	188.317	5.249	12.656	2.73	38.891	4.319	4.243	19.722	2.672	38.804	7.103	13.958	149.36	9.626	6.177	0.129	6.524	1.828	14.234	86.212	3.329	9.908	1.568	10.363	1.63
55	Xiaorequanzi	monzogranite	74.83	0.0293	13.15	0.98	0.09	0.04	0.31	5.4544	3.7068	0.0078	9.1612	1.18494	1.37869	1.46545	15.3899	1.769	0.281	8.93	0.104	5.142	1.874	29.118	164.563	4.522	11.674	2.036	36.209	4.072	3.897	18.595	2.437	35.776	10.448	12.331	128.051	8.538	5.391	0.123	5.656	1.633	12.795	76.196	2.972	8.735	1.422	9.518	1.469
56	Xiaorequanzi	monzogranite											0					1.179	0.235	2.942	0.005	0.822	2.049	30.927	185.071	3.867	12.479	2.685	38.175	4.277	4.097	19.399	2.636	38.622	6.675	13.563	145.44	9.586	5.942	0.13	6.304	1.764	13.982	84.952	3.274	9.883	1.559	10.272	1.611
57	Xiaorequanzi	Moyite	72.3957	0.1459	13.48	1.64	0.2	0.03	0.39	5.209	4.1415	0.0446	9.3505	2.02502	1.45259	1.57299	19.4546	3.027	1.578	9.235	0.68	5.751	2.91	17.99	64.943	278.496	4.703	2.035	9.484	0.876	16.93	37.958	5.487	11.2	93.44	23.103	185.977	6.054	5.122	0.738	4.691	0.859	5.515	28.161	1.201	3.385	0.52	3.545	0.571
58	Xiaorequanzi	Moyite	72.3738	0.1605	13.45	1.78	0.23	0.03	0.42	5.1195	4.1124	0.0468	9.2319	1.51859	1.46396	1.59693	20.3771	3.202	1.694	8.292	0.721	6.066	2.914	17.91	63.782	275.684	4.727	2.264	9.849	0.874	17.789	41.49	5.681	9.442	75.861	23.591	177.834	5.863	5.267	0.722	4.883	0.882	5.563	28.682	1.195	3.444	0.521	3.528	0.553
59	Xiaorequanzi	Moyite	72.7	0.1683	13.62	1.79	0.27	0.03	0.48	5.2882	4.0188	0.0515	9.307	1.68122	1.42257	1.56553	23.0028	4.483	2.228	6.607	0.992	2.939	4.073	20.287	66.5	313.286	5.123	2.013	10.691	0.877	20.415	44.932	6.601	11.227	79.41	27.57	190.534	6.172	6.189	0.866	5.587	1.04	6.483	32.932	1.377	3.817	0.578	3.934	0.615
60	Xiaorequanzi	Moyite	74.9164	0.183	12.89	1.24	0.19	0.09	0.29	4.9462	3.7501	0.0272	8.6963	0.783721	1.01219	1.05599	23.2822
61	Xiaorequanzi	Moyite	74.66	0.1789	12.75	1.15	0.22	0.03	0.45	4.9515	4.1466	0.0239	9.0981	1.35044	0.946888	1.00826	27.4782
LOI = loss on ignition.
A/CNK = molecular Al2O3/(CaO+Na2O+K2O), A/NK = molecular Al2O3/(Na2O+K2O).
Mg# = 100 × molecular Mg2+ / (Mg2+ + Fe2+), calculated by assuming TFeO = 0.9 × TFe2O3.
References:
Han, Z.K., Han, C.M., Xiao, W.J., Zhao, G.C., Wang, Z.M., Ao, S.J., Zhang, J.E., Wan, B., 2013, Palaeozoic porphyry Cu–Au and ultramafic Cu–Ni deposits in the eastern Tianshan orogenic belt: temporal constraints from U–Pb geochronology: International Geology Review, v. 55, p. 842–862. doi: 10.1080/00206814.2012.745977.
Hou, G.S., 2006. Geochemistry of Carboniferous volcanic rocks in the Jueluotag tectonic belt, East Tianshan: Institute of Geochemistry, Chinese Academy of Sciences, p. 1–94 (in Chinese with English abstract).
Kahaer, N., 2010. The Tectonic Settings and Metallogenic Characteristics of Eastern Tianshan Mountains in Late Paleozoic Era: Master's dissertation of Northwest University, p. 1–81 (in Chinese with English abstract).
Li, X.M., Xia, L.Q., Xia, Z.H., Xu, X.Y., Ma, Z.P., Wang, D.L., 2004. Zircon U-Pb geochronology of volcanic rocks of the Qi'eshan Group in the East Tianshan Mountains: Regional Geology of China. v. 23, p. 1215–1220 (in Chinese with English abstract).
No. 11 Geological Team of Xinjiang Bureau of Geology and Mineral Resources, 1995, Survey report of the K-45-60-C, K-45-71-B, K-45-72-A and K-45-79-B, Xinjiang.
Pan, S.K., 2009. Tectonic setting and petrogenesis analysis of the Xiaorequanzi Formation in Shanshan County: Master's dissertation of Xinjiang. Chang’an University, p. 1–43 (in Chinese with English abstract).
Qi, W.T., Muhetaer, Z., Nijiati A., Wu, Z.N., Fu, X.H., 2014. Geochemical characteristics of the volcanics from Qi'eshan Group in the East Tianshanand its revelation to the tectonic evolution of Paleo-Asian Ocean: Arid land geography. v. 6, p. 1182-1190 (in Chinese with English abstract).
Shen, P., Pan, H.D., Dong, L.H., 2014b. Yandong porphyry Cu deposit, Xinjiang, China: geology, geochemistry, and SIMS U-Pb zircon geochronology of host porphyries and associated alteration and mineralization: Journal of Asian Earth Sciences. v. 80, p. 197–217. doi: 10.1016/j.jseaes.2013.11.006.
Wang, P., Zhu, Z.X., Zhao, T.Y., Zhao, H.L., 2011. Volcanic rock petrochemical characteristics and tectonic significance of the Xiaorequanzi Formation, Jueletage area, Xinjiang: Xinjiang Geology. v. 29, p. 372–376 (in Chinese with English abstract).
Wang, Y.H., Xue, C.J., Liu, J.J., Wang, J.P., Yang, J.T., Zhang, F.F., Zhao, Z.A., Liu, B., 2015b. Early Carboniferous adakitic rocks in the area of the Tuwu deposit, eastern Tianshan, NW China: Slab melting and implications for porphyry copper mineralization: Journal of Asian Earth Sciences. v. 103, p. 332–349. doi: 10.1016/j.jseaes.2014.09.032.
Xianrouguli, Y., 2014. The East Tianshan Jueluotage erea Carboniferous geochemistry and its tectonic implications: Master's dissertation of Xinjiang University, p. 1–40 (in Chinese with English abstract).
Xiao, B., Chen, H.Y ., Hollings, P ., Han, J.S., Wang, Y .F., Y ang, J.T., Cai, K.D., 2017. Magmatic evolution of the Tuwu–Y andong porphyry Cu belt, NW China: Constraints from geochronology, geochemistry and Sr-Nd-Hf isotopes: Gondwana Research. v. 43, p. 74–100. doi: 10.1016/j.gr.2015.09.003.
Yang, Z., 2015. The origin of volcanic rocks from East Tianshanand its tracer for the mineralization: Xinjiang University, p. 1–57 (in Chinese with English abstract).
Zhang, H.R., Wei, G.F., Li, Y.J., Du, Z.G., Chai, D.L., 2010. Carboniferous lithologic association and tectonic evolution of Dananhu arc in the East Tianshan Mountains: Acta Petrologica et Mineralogica. v. 29, p. 1–14 (in Chinese with English abstract).
Zhang, L.C., Xiao, W.J., Qin, K.Z., Zhang, Q., 2006. The adakite connection of the Tuwu–Yandong copper porphyry belt, eastern Tianshan, NW China: trace element and Sr-Nd-Pb isotope geochemistry: Mineralium Deposita. v. 41, p. 188–200. doi: 10.1007/s00126-006-0058-6.
[truncated: 9 more columns]

## Sheet: Zircon Lu-Hf isotope
Supplement. Zircon Lu-Hf isotope compositions of Early Carboniferous magmatic rocks in the Dananhu Arc.
No	Location	Rock type	Rock age(Ma)	Age/Ma	176Yb/177Hf	176Lu/177Hf	176Hf/177Hf	εHf(0)	εHf(t)	TDM1	TDM2	Reference
Middle segment
1	Yandong	Quartz albite porphyry	323.6	325.3	0.037213	0.001487	0.282908	4.8	11.64	494	592	Xiao et al. 2017
2	Yandong	Quartz albite porphyry	323.6	325	0.046948	0.001785	0.282892	4.25	11.02	521	632	Xiao et al. 2017
3	Yandong	Quartz albite porphyry	323.6	325.2	0.057578	0.002241	0.282843	2.5	9.17	600	750	Xiao et al. 2017
4	Yandong	Quartz albite porphyry	323.6	323.2	0.064536	0.002513	0.282877	3.71	10.28	554	677	Xiao et al. 2017
5	Yandong	Quartz albite porphyry	323.6	324.2	0.069448	0.00281	0.282847	2.66	9.2	603	748	Xiao et al. 2017
6	Yandong	Quartz albite porphyry	323.6	360.6	0.047262	0.001881	0.282896	4.39	11.88	517	604	Xiao et al. 2017
7	Yandong	quartz porphyry	324.1	323.9	0.06508	0.002564	0.282858	3.03	9.61	583	721	Xiao et al. 2017
8	Yandong	quartz porphyry	324.1	326.8	0.068448	0.002664	0.282883	3.92	10.54	548	664	Xiao et al. 2017
9	Yandong	quartz porphyry	324.1	325	0.060066	0.002439	0.28288	3.82	10.45	548	668	Xiao et al. 2017
10	Yandong	quartz porphyry	324.1	325.1	0.050692	0.001975	0.282872	3.54	10.27	553	680	Xiao et al. 2017
11	Yandong	quartz porphyry	324.1	325.8	0.048418	0.00191	0.282881	3.87	10.63	538	657	Xiao et al. 2017
12	Yandong	quartz porphyry	324.1	325.5	0.096523	0.003866	0.282823	1.8	8.13	658	817	Xiao et al. 2017
13	Yandong	quartz porphyry	326.1	330.382	0.0352966	0.00157472	0.282982	7.42398	14.3543	388.493	421.833	Wang et al. 2018
14	Yandong	quartz porphyry	326.1	324.738	0.039194	0.00171112	0.282957	6.55559	13.3371	425.509	482.737	Wang et al. 2018
15	Yandong	quartz porphyry	326.1	332.983	0.029959	0.00141396	0.282966	6.85878	13.8789	409.784	454.375	Wang et al. 2018
16	Yandong	quartz porphyry	326.1	330.596	0.0420291	0.00182286	0.282978	7.26808	14.1484	397.527	435.218	Wang et al. 2018
17	Yandong	quartz porphyry	326.1	329.302	0.0488626	0.00208488	0.283013	8.52979	15.3268	348.129	358.521	Wang et al. 2018
18	Yandong	quartz porphyry	326.1	319.733	0.0332796	0.00147031	0.282966	6.8678	13.5956	410.04	462.255	Wang et al. 2018
19	Yandong	quartz porphyry	326.1	329.383	0.0462037	0.00200942	0.282982	7.41957	14.2339	393.299	428.782	Wang et al. 2018
20	Yandong	quartz porphyry	326.1	325.281	0.0411381	0.00178939	0.282993	7.808	14.5849	374.989	403.052	Wang et al. 2018
21	Yandong	quartz porphyry	326.1	320.452	0.0350584	0.00159167	0.282954	6.43507	13.152	429.053	491.282	Wang et al. 2018
22	Yandong	quartz porphyry	326.1	325.694	0.0315749	0.00139572	0.282954	6.43408	13.3036	426.83	485.629	Wang et al. 2018
23	Yandong	quartz porphyry	326.1	326.624	0.042684	0.00184684	0.28293	5.59586	12.3868	466.518	545.154	Wang et al. 2018
24	Yandong	quartz porphyry	326.1	331.108	0.0415446	0.00181337	0.282937	5.83769	12.7298	456.168	526.644	Wang et al. 2018
25	Yandong	quartz porphyry	326.1	324.621	0.0461462	0.00197677	0.282967	6.87872	13.6008	415.268	465.719	Wang et al. 2018
26	Yandong	quartz porphyry	326.1	321.693	0.0439989	0.00190091	0.282952	6.36847	13.0455	435.415	499.076	Wang et al. 2018
27	Yandong	quartz porphyry	327.6	323.947	0.0392304	0.0016946	0.283007	8.32333	15.0931	352.903	369.368	Wang et al. 2018
28	Yandong	quartz porphyry	327.6	327.759	0.0403105	0.0017553	0.283013	8.50767	15.3443	345.917	356.194	Wang et al. 2018
29	Yandong	quartz porphyry	327.6	328.898	0.0466646	0.00201838	0.282944	6.08867	12.8901	448.367	514.646	Wang et al. 2018
30	Yandong	quartz porphyry	327.6	327.232	0.0336583	0.00149741	0.282931	5.6081	12.4875	461.622	539.17	Wang et al. 2018
31	Yandong	quartz porphyry	327.6	338.433	0.0448702	0.00193463	0.282948	6.23789	13.2561	441.195	498.573	Wang et al. 2018
32	Yandong	quartz porphyry	327.6	325.839	0.0333008	0.00148278	0.282979	7.30828	14.1627	392.241	430.599	Wang et al. 2018
33	Yandong	quartz porphyry	327.6	328.501	0.0424395	0.00186513	0.282964	6.80437	13.6314	417.063	466.775	Wang et al. 2018
34	Yandong	quartz porphyry	327.6	320.24	0.0465249	0.0020002	0.282954	6.42933	13.0551	434.086	497.333	Wang et al. 2018
35	Yandong	quartz porphyry	327.6	328.38	0.0416779	0.00179586	0.282926	5.44974	12.2883	471.865	552.831	Wang et al. 2018
36	Yandong	quartz porphyry	327.6	331.594	0.0276315	0.00124666	0.282985	7.54027	14.5683	380.368	409.035	Wang et al. 2018
37	Yandong	quartz porphyry	327.6	335.337	0.0447758	0.00193135	0.282937	5.84598	12.8002	457.296	525.41	Wang et al. 2018
38	Yandong	quartz porphyry	327.6	324.035	0.0376121	0.00166986	0.282955	6.46085	13.2364	428.908	488.651	Wang et al. 2018
39	Yandong	quartz porphyry	327.6	330.557	0.0281584	0.00121401	0.283007	8.31703	15.3307	348.612	359.249	Wang et al. 2018
40	Tuwu	granite	332.3	321.3	0.114568	0.002015	0.28295	6.3	12.9	440	506	Wang et al. 2015b
41	Tuwu	granite	332.3	340	0.182536	0.002969	0.283062	10.3	17.1	283	254	Wang et al. 2015b
42	Tuwu	granite	332.3	335.3	0.129431	0.002314	0.282976	7.2	14.1	404	442	Wang et al. 2015b
43	Tuwu	granite	332.3	348.6	0.158374	0.003386	0.282978	7.3	14.2	414	447	Wang et al. 2015b
44	Tuwu	granite	332.3	333.1	0.219734	0.003329	0.283073	10.6	17.2	270	239	Wang et al. 2015b
45	Tuwu	granite	332.3	331.3	0.168966	0.002821	0.283004	8.2	14.9	369	388	Wang et al. 2015b
46	Tuwu	granite	332.3	320.3	0.234525	0.005592	0.283032	9.2	15.1	354	368	Wang et al. 2015b
47	Tuwu	granite	332.3	352.7	0.209396	0.00498	0.283081	10.9	17.5	270	235	Wang et al. 2015b
48	Tuwu	granite	332.3	339	0.203264	0.004839	0.283024	8.9	15.3	359	368	Wang et al. 2015b
49	Tuwu	granite	332.3	350.3	0.184403	0.003207	0.282957	6.5	13.5	444	491	Wang et al. 2015b
50	Tuwu	granite	332.3	333.2	0.159034	0.00321	0.28295	6.3	12.9	455	516	Wang et al. 2015b
51	Tuwu	granite	332.3	353.8	0.231309	0.005216	0.282867	3.4	9.9	615	724	Wang et al. 2015b
52	Tuwu	tonalite	334.7	331	0.08331	0.002515	0.282792	0.7	7.4	680	865	Wang et al. 2014
53	Tuwu	tonalite	334.7	334	0.081412	0.002188	0.282981	7.4	14.3	396	431	Wang et al. 2014
54	Tuwu	tonalite	334.7	325	0.107147	0.002411	0.282902	4.6	11.2	516	619	Wang et al. 2014
55	Tuwu	tonalite	334.7	336	0.09094	0.003311	0.283222	15.9	22.6	42	104	Wang et al. 2014
56	Tuwu	tonalite	334.7	351	0.130745	0.004249	0.28302	8.8	15.5	360	364	Wang et al. 2014
57	Tuwu	tonalite	334.7	331	0.073937	0.002257	0.282922	5.3	12.1	484	566	Wang et al. 2014
58	Tuwu	tonalite	334.7	304	0.073916	0.001963	0.282815	1.5	7.8	636	820	Wang et al. 2014
59	Tuwu	tonalite	334.7	332	0.07783	0.002167	0.283035	9.3	16.1	317	308	Wang et al. 2014
60	Tuwu	tonalite	334.7	334	0.062525	0.002177	0.282757	-0.5	6.3	725	938	Wang et al. 2014
61	Tuwu	tonalite	334.7	334	0.066622	0.002029	0.283017	8.7	15.6	342	346	Wang et al. 2014
62	Tuwu	tonalite	334.7	338	0.068293	0.00209	0.283022	8.8	15.8	336	334	Wang et al. 2014
63	Yandong	tonalite	335	353	0.135441	0.002167	0.283001	8.1	15.4	367	375	Wang et al. 2015a
64	Yandong	tonalite	335	334	0.165288	0.002603	0.283009	8.4	15.2	359	372	Wang et al. 2015a
65	Yandong	tonalite	335	332	0.14596	0.00251	0.282943	6.1	12.8	456	522	Wang et al. 2015a
66	Yandong	tonalite	335	341	0.164177	0.002761	0.28298	7.4	14.2	404	437	Wang et al. 2015a
67	Yandong	tonalite	335	333	0.188134	0.003645	0.282986	7.6	14.1	405	441	Wang et al. 2015a
68	Yandong	tonalite	335	345	0.175497	0.002828	0.282842	2.5	9.4	611	750	Wang et al. 2015a
69	Yandong	tonalite	335	331	0.241981	0.004668	0.283016	8.6	14.9	371	388	Wang et al. 2015a
70	Yandong	tonalite	335	333	0.160006	0.002841	0.283028	9.1	15.8	333	334	Wang et al. 2015a
71	Yandong	tonalite	335	343	0.161865	0.002905	0.283015	8.6	15.5	353	358	Wang et al. 2015a
72	Yandong	tonalite	335	330	0.096833	0.001895	0.282951	6.3	13.2	438	498	Wang et al. 2015a
73	Yandong	tonalite	335	330	0.145248	0.002434	0.282982	7.4	14.2	397	433	Wang et al. 2015a
74	Yandong	tonalite	335	338	0.162725	0.003599	0.282953	6.4	13	455	512	Wang et al. 2015a
75	Yandong	tonalite	335	324	0.141374	0.002375	0.282973	7.1	13.7	411	458	Wang et al. 2015a
76	Yandong	tonalite	335	327	0.56119	0.011466	0.28304	9.5	14.2	416	430	Wang et al. 2015a
77	Yandong	tonalite	335.3	340.867	0.0527776	0.00207477	0.282945	6.111	13.1482	448.137	507.389	Wang et al. 2018
78	Yandong	tonalite	335.3	335.999	0.0526846	0.00194496	0.282905	4.69965	11.6638	504.666	598.768	Wang et al. 2018
79	Yandong	tonalite	335.3	334.336	0.0562299	0.00214353	0.282925	5.42577	12.3118	477.362	555.944	Wang et al. 2018
80	Yandong	tonalite	335.3	334.183	0.0593403	0.00229622	0.282894	4.32304	11.1713	525.2	628.904	Wang et al. 2018
81	Yandong	tonalite	335.3	331.929	0.0513142	0.00198111	0.282941	5.99211	12.8646	451.893	518.636	Wang et al. 2018
82	Yandong	tonalite	335.3	330.454	0.0541387	0.00205211	0.283077	10.7838	17.6135	254.423	212.352	Wang et al. 2018
83	Yandong	plagiogranite porphyry	338.3	332.2	0.042637	0.001895	0.282964	6.8	13.8	417	438	Han et al. 2013
84	Yandong	plagiogranite porphyry	338.3	343.3	0.078345	0.003156	0.282949	6.3	13	456	481	Han et al. 2013
85	Yandong	plagiogranite porphyry	338.3	339.6	0.04753	0.001979	0.282952	6.4	13.4	436	461	Han et al. 2013
86	Yandong	plagiogranite porphyry	338.3	335.1	0.078239	0.003217	0.282947	6.2	12.9	459	484	Han et al. 2013
87	Yandong	plagiogranite porphyry	338.3	338.9	0.02352	0.001016	0.282937	5.8	13	447	478	Han et al. 2013
88	Yandong	plagiogranite porphyry	338.3	338.3	0.046368	0.001959	0.282966	6.9	13.9	416	435	Han et al. 2013
89	Yandong	plagiogranite porphyry	338.3	340.7	0.128198	0.004842	0.283009	8.4	14.7	383	390	Han et al. 2013
90	Yandong	plagiogranite porphyry	338.3	338.4	0.022626	0.001068	0.282927	5.5	12.7	462	497	Han et al. 2013
91	Yandong	plagiogranite porphyry	338.3	338.5	0.086651	0.003486	0.28294	5.9	12.6	473	500	Han et al. 2013
92	Yandong	plagiogranite porphyry	338.3	338.1	0.080863	0.003325	0.282967	6.9	13.6	431	450	Han et al. 2013
93	Yandong	plagiogranite porphyry	338.3		0.03665	0.001555	0.282965	6.8	13.9	412	432	Han et al. 2013
94	Yandong	plagiogranite porphyry	338.3		0.053006	0.002208	0.282907	4.8	11.7	506	547	Han et al. 2013
95	Yandong	plagiogranite porphyry	338.3		0.100892	0.003885	0.282945	6.1	12.7	471	495	Han et al. 2013
96	Yandong	plagiogranite porphyry	338.3		0.139658	0.00521	0.282989	7.7	13.9	420	431	Han et al. 2013
97	Yandong	plagiogranite porphyry	338.3		0.040468	0.00173	0.282945	6.1	13.2	443	470	Han et al. 2013
98	Yandong	plagiogranite porphyry	338.3		0.04258	0.001777	0.282927	5.5	12.5	470	504	Han et al. 2013
99	Yandong	plagiogranite porphyry	338.3		0.099095	0.00383	0.28294	5.9	12.5	478	504	Han et al. 2013
100	Yandong	diorite	338.6	346.754	0.0582672	0.00202555	0.282903	4.63659	11.806	508.38	597.997	Wang et al. 2018
101	Yandong	diorite	338.6	333.383	0.0630911	0.00208873	0.282868	3.39664	10.2736	560.466	685.764	Wang et al. 2018
102	Yandong	diorite	338.6	345.937	0.0437647	0.00156695	0.282913	4.98821	12.246	487.754	569.167	Wang et al. 2018
103	Yandong	diorite	338.6	337.976	0.0945871	0.00370597	0.282943	6.04496	12.6567	471.973	536.647	Wang et al. 2018
104	Yandong	diorite	338.6	332.413	0.0382899	0.00135291	0.282931	5.63701	12.6576	458.657	532.285	Wang et al. 2018
105	Yandong	diorite	338.6	336.075	0.0495948	0.00172867	0.282889	4.12762	11.1411	525.104	632.313	Wang et al. 2018
106	Yandong	diorite	338.6	333.968	0.0364337	0.00127614	0.282914	5.03115	12.1013	482.215	569.161	Wang et al. 2018
107	Yandong	diorite	338.6	335.507	0.0440248	0.00154766	0.282928	5.50043	12.5433	466.635	542.02	Wang et al. 2018
108	Yandong	diorite	338.6	332.857	0.0425436	0.00143274	0.282909	4.83323	11.8451	492.284	584.719	Wang et al. 2018
109	Yandong	diorite	338.6	340.957	0.0549244	0.00187613	0.282906	4.74853	11.8314	501.712	591.872	Wang et al. 2018
110	Yandong	diorite	338.6	342.352	0.0418681	0.00139388	0.282896	4.40271	11.6239	509.225	606.256	Wang et al. 2018
111	Tuwu	plagiogranite porphyry	339.3	334.8	0.037032	0.001629	0.282977	7.3	14.4	396	407	Han et al. 2013
112	Tuwu	plagiogranite porphyry	339.3	342.5	0.041951	0.00182	0.282951	6.3	13.4	436	456	Han et al. 2013
113	Tuwu	plagiogranite porphyry	339.3	344.8	0.041643	0.001783	0.282949	6.3	13.3	438	458	Han et al. 2013
114	Tuwu	plagiogranite porphyry	339.3	333.8	0.033176	0.001411	0.282966	6.9	14	410	425	Han et al. 2013
115	Tuwu	plagiogranite porphyry	339.3	340.4	0.031756	0.001401	0.282928	5.5	12.7	464	491	Han et al. 2013
116	Tuwu	plagiogranite porphyry	339.3	335.7	0.02814	0.001241	0.282962	6.7	13.9	414	430	Han et al. 2013
117	Tuwu	plagiogranite porphyry	339.3	340.2	0.027006	0.001207	0.282915	5.1	12.3	480	511	Han et al. 2013
118	Tuwu	plagiogranite porphyry	339.3	340.9	0.032088	0.001418	0.282949	6.3	13.4	434	455	Han et al. 2013
119	Tuwu	plagiogranite porphyry	339.3	345	0.038649	0.001693	0.282922	5.3	12.4	476	504	Han et al. 2013
120	Tuwu	plagiogranite porphyry	339.3	344.9	0.020435	0.000902	0.282932	5.7	12.9	452	477	Han et al. 2013
121	Tuwu	plagiogranite porphyry	339.3	338	0.052865	0.002294	0.282952	6.4	13.3	440	460	Han et al. 2013
122	Tuwu	plagiogranite porphyry	339.3	325.2	0.034012	0.001499	0.282939	5.9	13	449	473	Han et al. 2013
123	Tuwu	plagiogranite porphyry	339.3	348.4	0.032389	0.001423	0.283012	8.5	15.6	343	344	Han et al. 2013
124	Tuwu	plagiogranite porphyry	339.3	341.8	0.020258	0.000919	0.282902	4.6	11.9	495	529	Han et al. 2013
125	Tuwu	plagiogranite porphyry	339.3	334.2	0.049226	0.002094	0.282946	6.1	13.1	447	469	Han et al. 2013
126	Tuwu	plagiogranite porphyry	339.3	339.3	0.042891	0.00183	0.282955	6.5	13.5	431	450	Han et al. 2013
127	Tuwu	plagiogranite porphyry	339.3	339.3	0.030606	0.001354	0.28294	5.9	13.1	447	469	Han et al. 2013
128	Tuwu	plagiogranite porphyry	339.3	339.3	0.033929	0.001466	0.282952	6.4	13.5	430	449	Han et al. 2013
129	Tuwu	plagiogranite porphyry	339.3	339.3	0.032489	0.001436	0.282971	7	14.2	403	417	Han et al. 2013
130	Tuwu	plagiogranite porphyry	339.3	339.3	0.034008	0.001489	0.282929	5.6	12.7	463	489	Han et al. 2013
131	Tuwu	plagiogranite porphyry	339.3	339.3	0.022354	0.001034	0.28293	5.6	12.8	457	483	Han et al. 2013
132	Tuwu	plagiogranite porphyry	339.3	339.3	0.026605	0.001196	0.282927	5.5	12.7	463	489	Han et al. 2013
133	Tuwu	plagiogranite porphyry	339.3	339.3	0.027099	0.001186	0.282933	5.7	12.9	454	479	Han et al. 2013
134	Tuwu	plagiogranite porphyry	339.3	339.3	0.025093	0.001132	0.282939	5.9	13.1	446	469	Han et al. 2013
135	Yandong	plagiogranite porphyry	339.3	339.9	0.048205	0.00197	0.282888	4.09	11.13	530	636	Xiao et al. 2017
136	Yandong	plagiogranite porphyry	339.3	340.7	0.034555	0.001424	0.282884	3.97	11.15	527	635	Xiao et al. 2017
137	Yandong	plagiogranite porphyry	339.3	338.9	0.036661	0.001456	0.282938	5.86	12.99	451	516	Xiao et al. 2017
138	Yandong	plagiogranite porphyry	339.3	341	0.034633	0.001422	0.28292	5.22	12.4	477	555	Xiao et al. 2017
139	Yandong	plagiogranite porphyry	339.3	336.2	0.045169	0.001871	0.282849	2.72	9.7	585	725	Xiao et al. 2017
140	Yandong	plagiogranite porphyry	339.3	364.4	0.039289	0.001658	0.282917	5.11	12.74	484	552	Xiao et al. 2017
141	Yandong	plagiogranite porphyry	339.3	365.9	0.060595	0.002474	0.282874	3.6	11.05	558	661	Xiao et al. 2017
142	Tuwu	porphyritic granite	357	361.8	0.046808	0.001616	0.282919	5.19	12.8	480	547	Du et al. 2019
143	Tuwu	porphyritic granite	357	354.2	0.045053	0.001505	0.282902	4.59	12	503	588	Du et al. 2019
144	Tuwu	porphyritic granite	357	351.5	0.074748	0.00244	0.282934	5.73	12.9	469	531	Du et al. 2019
145	Tuwu	porphyritic granite	357	361.4	0.055485	0.001815	0.282923	5.33	12.9	477	542	Du et al. 2019
146	Tuwu	porphyritic granite	357	350.6	0.043047	0.001378	0.282922	5.3	12.7	472	543	Du et al. 2019
147	Tuwu	porphyritic granite	357	360.4	0.034376	0.001108	0.282923	5.32	13	468	532	Du et al. 2019
148	Tuwu	porphyritic granite	357	357.7	0.044227	0.001503	0.282884	3.97	11.5	528	625	Du et al. 2019
149	Tuwu	porphyritic granite	357	355.6	0.076706	0.002337	0.282949	6.27	13.5	445	493	Du et al. 2019
150	Tuwu	porphyritic granite	357	353.5	0.052439	0.001668	0.282921	5.25	12.6	478	548	Du et al. 2019
151	Tuwu	porphyritic granite	357	356.8	0.05646	0.002075	0.282888	4.11	11.5	531	626	Du et al. 2019
152	Tuwu	porphyritic granite	357	354.8	0.063488	0.002126	0.282907	4.76	12.1	505	586	Du et al. 2019
153	Tuwu	porphyritic granite	357	351.3	0.059294	0.001793	0.282914	5.02	12.3	490	567	Du et al. 2019
154	Tuwu	porphyritic granite	357	361.4	0.082727	0.002457	0.282919	5.21	12.6	490	559	Du et al. 2019
155	Tuwu	porphyritic granite	357	361.5	0.055953	0.00175	0.282941	5.96	13.5	450	500	Du et al. 2019
156	Tuwu	porphyritic granite	357	354.9	0.035503	0.00111	0.28293	5.59	13.1	458	518	Du et al. 2019
157	Tuwu	porphyritic granite	357	362.1	0.055099	0.001803	0.282959	6.6	14.1	425	460	Du et al. 2019
158	Tuwu	porphyritic granite	360	364.2	0.027888	0.000955	0.282904	4.66	12.5	493	569	Du et al. 2019
159	Tuwu	porphyritic granite	360	359.6	0.052244	0.001688	0.282899	4.48	12	510	595	Du et al. 2019
160	Tuwu	porphyritic granite	360	368.7	0.024169	0.00083	0.28292	5.24	13.2	468	527	Du et al. 2019
161	Tuwu	porphyritic granite	360	350.1	0.022697	0.000708	0.282933	5.69	13.2	449	508	Du et al. 2019
162	Tuwu	porphyritic granite	360	352.4	0.034783	0.001273	0.282886	4.01	11.5	523	622	Du et al. 2019
163	Tuwu	porphyritic granite	360	368.2	0.03995	0.001429	0.282919	5.22	13	477	539	Du et al. 2019
164	Tuwu	porphyritic granite	360	366.4	0.031841	0.001178	0.282888	4.09	11.9	519	608	Du et al. 2019
165	Tuwu	porphyritic granite	360	354.7	0.032083	0.001089	0.282905	4.71	12.3	493	574	Du et al. 2019
166	Tuwu	porphyritic granite	360	355.4	0.037983	0.001289	0.28293	5.6	13.1	459	519	Du et al. 2019
167	Tuwu	porphyritic granite	360	352.2	0.034997	0.001168	0.282926	5.44	12.9	464	530	Du et al. 2019
168	Tuwu	porphyritic granite	360	353.8	0.045419	0.001471	0.282897	4.43	11.9	509	598	Du et al. 2019
169	Tuwu	porphyritic granite	360	366.2	0.046431	0.001561	0.282925	5.42	13.1	470	529	Du et al. 2019
170	Tuwu	porphyritic granite	360	370.7	0.033815	0.001067	0.282924	5.37	13.3	466	522	Du et al. 2019
171	Tuwu	porphyritic granite	360	354.8	0.050199	0.001611	0.282932	5.66	13.1	461	521	Du et al. 2019
172	Tuwu	porphyritic granite	360	352.9	0.029021	0.000953	0.282916	5.09	12.6	476	548	Du et al. 2019
173	Tuwu	porphyritic granite	360	369.2	0.062559	0.002056	0.282929	5.57	13.2	470	526	Du et al. 2019
174	Qi’eshan Group	dacite	344	357.6	0.296282	0.008802	0.283038		15.1	386	393	Mao et al. 2022
175	Qi’eshan Group	dacite	344	364.3	0.181236	0.005293	0.283013		15.2	386	395	Mao et al. 2022
176	Qi’eshan Group	dacite	344	364.4	0.199454	0.005584	0.282962		13.3	471	514	Mao et al. 2022
177	Qi’eshan Group	dacite	344	364.5	0.209046	0.006139	0.283011		14.9	400	413	Mao et al. 2022
178	Qi’eshan Group	dacite	344	344	0.195388	0.005523	0.283027		15.3	366	374	Mao et al. 2022
179	Qi’eshan Group	dacite	344	389	0.21736	0.006163	0.283012		15.4	398	402	Mao et al. 2022
180	Qi’eshan Group	dacite	344	395	0.16525	0.00488	0.283086		18.5	265	208	Mao et al. 2022
181	Qi’eshan Group	dacite	344	340.9	0.198152	0.005344	0.283083		17.2	274	246	Mao et al. 2022
182	Qi’eshan Group	dacite	344	360	0.181628	0.00511	0.283023		15.5	368	371	Mao et al. 2022
183	Qi’eshan Group	dacite	344	375.2	0.249251	0.007258	0.283047		16.1	352	345	Mao et al. 2022
184	Qi’eshan Group	dacite	344	368.3	0.071138	0.002051	0.282975		14.7	408	430	Mao et al. 2022
185	Qi’eshan Group	dacite	344	359	0.222697	0.006528	0.282955		12.7	498	548	Mao et al. 2022
186	Qi’eshan Group	dacite	344	374.9	0.209764	0.006121	0.283018		15.4	387	392	Mao et al. 2022
187	Qi’eshan Group	dacite	344	375.4	0.23572	0.006803	0.283072		17.1	305	280	Mao et al. 2022
188	Qi’eshan Group	dacite	344	364.2	0.177072	0.005283	0.283013		15.2	385	394	Mao et al. 2022
189	Qi’eshan Group	dacite	344	363.2	0.255742	0.007627	0.282906		10.8	600	675	Mao et al. 2022
190	Qi’eshan Group	dacite	344	361.8	0.242562	0.006937	0.283071		16.8	308	289	Mao et al. 2022
191	Qi’eshan Group	dacite	344	367	0.061719	0.001793	0.282967		14.5	416	444	Mao et al. 2022
192	Qi’eshan Group	dacite	344	366	0.200551	0.005911	0.28299		14.2	431	457	Mao et al. 2022
193	Qi’eshan Group	dacite	344	347.7	0.062471	0.001746	0.283054		17.2	288	255	Mao et al. 2022
194	Qi’eshan Group	dacite	344	348.3	0.234666	0.006651	0.283042		15.6	353	355	Mao et al. 2022
195	Qi’eshan Group	dacite	344	366	0.242243	0.006973	0.283021		15.1	393	403	Mao et al. 2022
196	Qi’eshan Group	dacite	344	342.5	0.236633	0.006696	0.282946		12.1	516	577	Mao et al. 2022
Western segment
1	Xiaorequanzi	monzogranite	333	341.6	0.055394	0.001471	0.282759	-0.47	6.55	708	921.7	This study
2	Xiaorequanzi	monzogranite	333	346.1	0.070716	0.001663	0.282809	1.3	7.36	639.3	836.1	This study
3	Xiaorequanzi	monzogranite	333	330.1	0.061475	0.001408	0.282691	-2.85	4.27	802.8	1069.7	This study
4	Xiaorequanzi	monzogranite	333	337.7	0.051959	0.001433	0.282819	1.68	8.56	620.3	788.4	This study
5	Xiaorequanzi	monzogranite	333	346.3	0.048369	0.001224	0.282746	-0.93	6.15	721.8	947.4	This study
6	Xiaorequanzi	monzogranite	333	341.5	0.053212	0.001392	0.282742	-1.05	5.95	729.7	958.2	This study
7	Xiaorequanzi	monzogranite	333	343.3	0.061888	0.001501	0.282799	0.94	7.91	651.4	833.4	This study
8	Xiaorequanzi	monzogranite	333	336.1	0.054455	0.001151	0.282774	0.06	7.11	680.7	884.6	This study
9	Xiaorequanzi	monzogranite	333	345.1	0.062663	0.001919	0.28273	-1.49	5.42	758.2	993	This study
10	Xiaorequanzi	monzogranite	333	332.1	0.053356	0.001156	0.282836	2.26	7.97	592.1	781	This study
11	Xiaorequanzi	monzogranite	333	334.6	0.040407	0.000956	0.282782	0.36	7.43	665.1	863.4	This study
12	Xiaorequanzi	monzogranite	333	332	0.047432	0.001352	0.282731	-1.43	5.57	744.5	982.3	This study
13	Xiaorequanzi	monzogranite	333	326.1	0.077054	0.001744	0.28279	0.63	7.57	668.4	856.1	This study
14	Xiaorequanzi	monzogranite	333	334.6	0.066079	0.001481	0.282779	0.23	7.26	679.5	876.8	This study
15	Xiaorequanzi	moyite	344.6	346.9	0.033306	0.000931	0.282896	4.38	11.8	504.1	597.4	This study
16	Xiaorequanzi	moyite	343.6	343.3	0.029919	0.000921	0.282912	4.94	12.28	481.3	563.6	This study
17	Xiaorequanzi	moyite	343.6	342.2	0.033997	0.000893	0.282836	2.25	9.57	588.6	735.5	This study
18	Xiaorequanzi	moyite	343.6	344.2	0.050501	0.001616	0.282907	4.76	11.97	497.6	584.4	This study
19	Xiaorequanzi	moyite	343.6	342	0.057411	0.001242	0.282955	6.46	13.71	424.2	472	This study
20	Xiaorequanzi	granodiorite porphyry	336.7	351.8	0.079179	0.002902	0.282875	3.2	10.3	563.6	672.8	Zhang et al. 2021
21	Xiaorequanzi	granodiorite porphyry	336.7	349.3	0.08098	0.002871	0.282893	3.8	10.9	535.2	631.3	Zhang et al. 2021
22	Xiaorequanzi	granodiorite porphyry	336.7	335.3	0.089738	0.002823	0.282882	3.4	10.3	551	662.9	Zhang et al. 2021
23	Xiaorequanzi	granodiorite porphyry	336.7	345	0.083355	0.002739	0.28293	5.1	12.2	479.1	549.2	Zhang et al. 2021
24	Xiaorequanzi	granodiorite porphyry	336.7	331.6	0.090242	0.00277	0.282954	6	12.7	443.6	502	Zhang et al. 2021
25	Xiaorequanzi	granodiorite porphyry	336.7	345.6	0.054649	0.001963	0.282905	4.3	11.5	504.5	592.8	Zhang et al. 2021
26	Xiaorequanzi	granodiorite porphyry	336.7	321.9	0.09181	0.00317	0.28289	3.7	10.2	544.4	656.5	Zhang et al. 2021
27	Xiaorequanzi	granodiorite porphyry	336.7	326.6	0.04097	0.001146	0.28294	5.5	12.5	444.6	514.3	Zhang et al. 2021
28	Xiaorequanzi	granodiorite porphyry	336.7	331.2	0.067487	0.002189	0.282923	4.9	11.8	480.9	562.7	Zhang et al. 2021
29	Xiaorequanzi	granodiorite porphyry	336.7	341.6	0.044149	0.001603	0.282919	4.8	12	479.1	557.6	Zhang et al. 2021
30	Xiaorequanzi	granodiorite porphyry	336.7	328.2	0.107092	0.003512	0.282887	3.6	10.2	554.1	664.7	Zhang et al. 2021
31	Xiaorequanzi	granodiorite porphyry	336.7	341.2	0.091873	0.003298	0.282916	4.6	11.5	507.8	591	Zhang et al. 2021
32	Xiaorequanzi	granodiorite porphyry	336.7	324.1	0.071294	0.00267	0.282925	4.9	11.6	485.4	570.3	Zhang et al. 2021
33	Xiaorequanzi	granodiorite porphyry	336.7	342.5	0.041478	0.001445	0.282897	4	11.3	508.8	604.9	Zhang et al. 2021
34	Xiaorequanzi	granodiorite porphyry	336.7	337.3	0.065546	0.002194	0.282919	4.7	11.8	487.3	569.2	Zhang et al. 2021
35	Xiaorequanzi	albitophyre	338.3	335.9	0.103237	0.002949	0.282941	5.5	12.3	465.1	531.6	Zhang et al. 2021
36	Xiaorequanzi	albitophyre	338.3	367.3	0.083603	0.002385	0.282927	5	12.6	477.6	537	Zhang et al. 2021
37	Xiaorequanzi	albitophyre	338.3	339.5	0.120276	0.003689	0.28291	4.4	11.2	521.8	609.7	Zhang et al. 2021
38	Xiaorequanzi	albitophyre	338.3	343.2	0.09464	0.002745	0.28294	5.5	12.5	463.8	526.9	Zhang et al. 2021
39	Xiaorequanzi	albitophyre	338.3	358.3	0.145019	0.00399	0.282921	4.8	11.9	509.2	580.1	Zhang et al. 2021
40	Xiaorequanzi	albitophyre	338.3	322.8	0.08982	0.002465	0.282948	5.8	12.4	448.4	515.6	Zhang et al. 2021
41	Xiaorequanzi	albitophyre	338.3	313.8	0.079167	0.002353	0.282932	5.2	11.7	470.9	555.6	Zhang et al. 2021
42	Xiaorequanzi	albitophyre	338.3	314.9	0.116797	0.003205	0.282923	4.9	11.2	494.7	585.2	Zhang et al. 2021
43	Xiaorequanzi	albitophyre	338.3	341.1	0.101243	0.003272	0.282933	5.2	12.1	481.6	551.9	Zhang et al. 2021
44	Xiaorequanzi	dacite porphyry	341.3	344.1	0.205647	0.005666	0.282919	4.7	11.1	538.7	616.2	Zhang et al. 2021
45	Xiaorequanzi	dacite porphyry	341.3	338.9	0.076812	0.002121	0.282923	4.9	12	480.2	557.8	Zhang et al. 2021
46	Xiaorequanzi	dacite porphyry	341.3	339.5	0.0778	0.002297	0.282959	6.2	13.2	429.4	478.1	Zhang et al. 2021
47	Xiaorequanzi	dacite porphyry	341.3	342.8	0.091981	0.002603	0.28293	5.1	12.2	477.3	548.4	Zhang et al. 2021
48	Xiaorequanzi	dacite porphyry	341.3	338.4	0.071973	0.002054	0.282941	5.5	12.6	453.3	516.8	Zhang et al. 2021
49	Xiaorequanzi	dacite porphyry	341.3	349.7	0.108712	0.002991	0.282939	5.5	12.6	467.9	528.5	Zhang et al. 2021
50	Xiaorequanzi	dacite porphyry	341.3	339.3	0.112752	0.003088	0.282955	6	12.9	445.7	499.9	Zhang et al. 2021
51	Xiaorequanzi	dacite porphyry	341.3	337.6	0.087822	0.00287	0.282932	5.2	12.1	476.8	548.8	Zhang et al. 2021
52	Xiaorequanzi	dacite porphyry	341.3	348.5	0.086323	0.002372	0.282938	5.4	12.6	461.3	522	Zhang et al. 2021
53	Xiaorequanzi	dacite porphyry	341.3	340.7	0.063666	0.001925	0.282942	5.6	12.7	449.8	510.7	Zhang et al. 2021
54	Xiaorequanzi	dacite porphyry	341.3	344.8	0.100424	0.002798	0.282958	6.1	13.2	437.2	485.3	Zhang et al. 2021
55	Xiaorequanzi	dacite porphyry	341.3	344.2	0.09067	0.002567	0.282922	4.8	11.9	488.6	565.2	Zhang et al. 2021
56	Xiaorequanzi	dacite porphyry	341.3	342.7	0.07881	0.002255	0.282925	5	12.1	479.3	553.5	Zhang et al. 2021
57	Xiaorequanzi	dacite porphyry	341.3	348.8	0.072624	0.00208	0.282956	6	13.3	431.8	477.6	Zhang et al. 2021
58	Xiaorequanzi	dacite porphyry	341.3	337.4	0.134026	0.003657	0.282941	5.5	12.2	474.7	541.2	Zhang et al. 2021
59	Xiaorequanzi Formation	Rhyolite	343	339	0.0592473	0.00121844	0.282962	6.72519	13.9165	413.037	456.135	This study
60	Xiaorequanzi Formation	Rhyolite	343	340	0.0487509	0.000976934	0.282908	4.81576	12.0814	487.015	574.101	This study
61	Xiaorequanzi Formation	Rhyolite	343	340	0.016564	0.000448384	0.282881	3.85153	11.2356	518.387	628.055	This study
62	Xiaorequanzi Formation	Rhyolite	343	341	0.0335613	0.000652697	0.282843	2.50056	9.85919	574.834	716.564	This study
63	Xiaorequanzi Formation	Rhyolite	343	341	0.0434382	0.000806028	0.282816	1.56453	8.88781	614.459	778.427	This study
64	Xiaorequanzi Formation	Rhyolite	343	344	0.0338609	0.000696275	0.282813	1.45841	8.87131	616.895	781.796	This study
65	Xiaorequanzi Formation	Rhyolite	343	343	0.0272249	0.000659966	0.282811	1.39498	8.79445	618.821	785.915	This study
66	Xiaorequanzi Formation	Rhyolite	343	344	0.0306714	0.000760829	0.282805	1.15603	8.55399	629.973	801.994	This study
67	Xiaorequanzi Formation	Rhyolite	343	346	0.0253749	0.000622267	0.282801	1.02278	8.4956	632.956	807.254	This study
68	Xiaorequanzi Formation	Rhyolite	343	346	0.038255	0.000727748	0.282781	0.327941	7.77603	662.317	853.034	This study
69	Xiaorequanzi Formation	Rhyolite	343	348	0.0645023	0.00155384	0.282781	0.323824	7.62457	677.24	864.21	This study
70	Xiaorequanzi Formation	Rhyolite	343	343	0.0317537	0.000699681	0.282772	-0.0110401	7.37834	675.276	876.011	This study
71	Xiaorequanzi Formation	Rhyolite	343	343	0.0303701	0.0008089	0.282751	-0.72892	6.63509	705.779	923.26	This study
72	Xiaorequanzi Formation	Rhyolite	343	342	0.0323708	0.000825042	0.282741	-1.08776	6.25077	720.353	946.911	This study
73	Xiaorequanzi Formation	quartz diorite porphyrite	351.1	339.4	0.094263	0.002721	0.282911	4.5	11.4	506.2	593.5	Zhang et al. 2021
74	Xiaorequanzi Formation	quartz diorite porphyrite	351.1	350.7	0.050599	0.001647	0.282926	5	12.4	470.8	539.3	Zhang et al. 2021
75	Xiaorequanzi Formation	quartz diorite porphyrite	351.1	360.1	0.074915	0.002387	0.282906	4.3	11.7	509.8	590.3	Zhang et al. 2021
76	Xiaorequanzi Formation	quartz diorite porphyrite	351.1	350.7	0.082104	0.003024	0.282835	1.8	8.9	624.1	763.4	Zhang et al. 2021
77	Xiaorequanzi Formation	quartz diorite porphyrite	351.1	343.9	0.075862	0.002129	0.282941	5.5	12.7	454.5	515.3	Zhang et al. 2021
78	Xiaorequanzi Formation	quartz diorite porphyrite	351.1	362.2	0.090675	0.003469	0.282972	6.6	13.8	424.9	455.8	Zhang et al. 2021
79	Xiaorequanzi Formation	quartz diorite porphyrite	351.1	342.6	0.065453	0.002376	0.282841	2	9.1	605.3	746.4	Zhang et al. 2021
80	Xiaorequanzi Formation	quartz diorite porphyrite	351.1	346.7	0.074271	0.002554	0.282859	2.6	9.8	580.9	705.1	Zhang et al. 2021
81	Xiaorequanzi Formation	quartz diorite porphyrite	351.1	367.4	0.058505	0.002022	0.282911	4.5	12.2	496.2	567.6	Zhang et al. 2021
82	Xiaorequanzi Formation	quartz diorite porphyrite	351.1	351.9	0.070133	0.002406	0.282889	3.7	10.9	535	633.2	Zhang et al. 2021
83	Xiaorequanzi Formation	quartz diorite porphyrite	351.1	358.1	0.055342	0.002113	0.282905	4.3	11.7	506.4	587.9	Zhang et al. 2021
84	Xiaorequanzi Formation	quartz diorite porphyrite	351.1	349.4	0.043922	0.001662	0.282932	5.2	12.6	462.2	526.4	Zhang et al. 2021
85	Xiaorequanzi Formation	tuffaceous sandstone	352.5	354.9	0.037528	0.001348	0.282837	1.8	9.4	593.7	732.6	Zhang et al. 2021
86	Xiaorequanzi Formation	tuffaceous sandstone	352.5	339.9	0.077754	0.002749	0.282194	-20.9	-14	1564.2	2194.2	Zhang et al. 2021
87	Xiaorequanzi Formation	tuffaceous sandstone	352.5	370.5	0.04698	0.001468	0.282788	0.1	8	666.3	836.6	Zhang et al. 2021
88	Xiaorequanzi Formation	tuffaceous sandstone	352.5	337.6	0.050819	0.001965	0.282759	-0.9	6.2	716.4	926.2	Zhang et al. 2021
89	Xiaorequanzi Formation	tuffaceous sandstone	352.5	318.6	0.037297	0.001184	0.282565	-7.8	-0.9	976.6	1361.4	Zhang et al. 2021
90	Xiaorequanzi Formation	tuffaceous sandstone	352.5	325.9	0.076339	0.002788	0.282782	-0.1	6.5	699.8	893.8	Zhang et al. 2021
91	Xiaorequanzi Formation	tuffaceous sandstone	352.5	313.2	0.083955	0.002651	0.282808	0.8	7.2	658.3	839.6	Zhang et al. 2021
92	Xiaorequanzi Formation	tuffaceous sandstone	352.5	352.1	0.09379	0.002946	0.28282	1.2	8.4	646	796.8	Zhang et al. 2021
93	Xiaorequanzi Formation	quartz andesite	353.5	358	0.086425	0.002504	0.28294	5.5	12.9	460.7	515.5	Zhang et al. 2021
94	Xiaorequanzi Formation	quartz andesite	353.5	353.2	0.10485	0.002938	0.28292	4.8	12	495.5	568.8	Zhang et al. 2021
95	Xiaorequanzi Formation	quartz andesite	353.5	355.4	0.123811	0.003347	0.28287	3	10.1	577.8	688.3	Zhang et al. 2021
96	Xiaorequanzi Formation	quartz andesite	353.5	356.5	0.138248	0.005009	0.282794	0.3	7.1	726.8	884.2	Zhang et al. 2021
97	Xiaorequanzi Formation	quartz andesite	353.5	356.3	0.039568	0.001271	0.282641	-5.1	2.5	871.5	1171.6	Zhang et al. 2021
98	Xiaorequanzi Formation	quartz andesite	353.5	361.3	0.061847	0.002249	0.282714	-2.5	5	788.2	1019.3	Zhang et al. 2021
99	Xiaorequanzi Formation	quartz andesite	353.5	354	0.093805	0.002924	0.282897	3.9	11.1	531.1	622.2	Zhang et al. 2021
100	Xiaorequanzi Formation	quartz andesite	353.5	349.7	0.20385	0.007082	0.282808	0.8	6.9	751.5	886.8	Zhang et al. 2021
101	Xiaorequanzi Formation	quartz andesite	353.5	349.5	0.127424	0.004184	0.282883	3.5	10.3	571.4	673.7	Zhang et al. 2021
102	Xiaorequanzi Formation	quartz andesite	353.5	350.7	0.122712	0.003394	0.282929	5.1	12.1	488.3	556.4	Zhang et al. 2021
103	Xiaorequanzi Formation	quartz andesite	353.5	346.2	0.101384	0.003381	0.282884	3.5	10.4	556.7	661	Zhang et al. 2021
104	Xiaorequanzi Formation	tuff	354.5	360	0.091425	0.002799	0.282607	-6.3	1.1	958.3	1267.6	Zhang et al. 2021
105	Xiaorequanzi Formation	tuff	354.5	350.6	0.067431	0.00225	0.282471	-11.1	-3.8	1141.8	1568.1	Zhang et al. 2021
106	Xiaorequanzi Formation	tuff	354.5	349.6	0.062454	0.001922	0.282763	-0.8	6.6	709.8	910	Zhang et al. 2021
107	Xiaorequanzi Formation	tuff	354.5	358.2	0.098558	0.003246	0.282526	-9.2	-2	1092.2	1457.1	Zhang et al. 2021
108	Xiaorequanzi Formation	quartz diorite porphyrite	355.7	350.6	0.172139	0.004518	0.282905	4.2	11	543.4	629.5	Zhang et al. 2021
109	Xiaorequanzi Formation	quartz diorite porphyrite	355.7	345.9	0.086958	0.002775	0.28289	3.7	10.8	538.8	639.3	Zhang et al. 2021
110	Xiaorequanzi Formation	quartz diorite porphyrite	355.7	357.8	0.095196	0.002574	0.282927	5	12.4	480.7	545.9	Zhang et al. 2021
111	Xiaorequanzi Formation	quartz diorite porphyrite	355.7	349.1	0.048431	0.0014	0.282889	3.7	11.1	519.8	618.7	Zhang et al. 2021
112	Xiaorequanzi Formation	quartz diorite porphyrite	355.7	354.7	0.057466	0.001726	0.28289	3.7	11.2	523.4	618.8	Zhang et al. 2021
113	Xiaorequanzi Formation	quartz diorite porphyrite	355.7	355.6	0.336331	0.009768	0.282894	3.8	9.5	662.6	731	Zhang et al. 2021
114	Xiaorequanzi Formation	quartz diorite porphyrite	355.7	349.8	0.214324	0.00576	0.282969	6.5	13	458.5	501.4	Zhang et al. 2021
115	Xiaorequanzi Formation	quartz diorite porphyrite	355.7	353.3	0.101426	0.002748	0.282953	5.9	13.2	444.2	491.7	Zhang et al. 2021
116	Xiaorequanzi Formation	quartz diorite porphyrite	355.7	361.8	0.123307	0.003249	0.282958	6.1	13.4	443	483.6	Zhang et al. 2021
117	Xiaorequanzi Formation	quartz diorite porphyrite	355.7	349.9	0.050205	0.001467	0.282969	6.5	14	406	438.4	Zhang et al. 2021
118	Xiaorequanzi Formation	quartz diorite porphyrite	355.7	349.2	0.451641	0.011319	0.282931	5.2	10.3	626.5	669.9	Zhang et al. 2021
119	Xiaorequanzi Formation	quartz diorite porphyrite	355.7	353	0.105957	0.003282	0.282913	4.5	11.6	511.4	590.5	Zhang et al. 2021
120	Xiaorequanzi Formation	quartz diorite porphyrite	355.7	357.3	0.504472	0.012722	0.282863	2.8	7.7	801.4	844.5	Zhang et al. 2021
121	Xiaorequanzi Formation	quartz diorite porphyrite	355.7	361.1	0.067913	0.002232	0.282918	4.7	12.2	489.3	559.1	Zhang et al. 2021
122	Xiaorequanzi	granodiorite porphyry	362.6	367.1	0.107677	0.00341	0.282827	1.5	8.8	643.2	779.4	Zhang et al. 2021
123	Xiaorequanzi	granodiorite porphyry	362.6	376.7	0.091912	0.003023	0.282845	2.1	9.8	609.7	728.6	Zhang et al. 2021
124	Xiaorequanzi	granodiorite porphyry	362.6	370.3	0.100413	0.003322	0.282841	2	9.4	620.4	744.9	Zhang et al. 2021
125	Xiaorequanzi	granodiorite porphyry	362.6	361	0.064543	0.002104	0.282915	4.6	12.1	492.7	565.1	Zhang et al. 2021
126	Xiaorequanzi	granodiorite porphyry	362.6	362.3	0.152086	0.005154	0.282795	0.3	7.2	728.9	882.3	Zhang et al. 2021
127	Xiaorequanzi	granodiorite porphyry	362.6	368.7	0.106768	0.00347	0.282839	1.9	9.3	626.4	752.9	Zhang et al. 2021
128	Xiaorequanzi	granodiorite porphyry	362.6	362.2	0.090974	0.0033	0.282828	1.5	8.8	640	778.3	Zhang et al. 2021
129	Xiaorequanzi	granodiorite porphyry	362.6	374.9	0.122964	0.003718	0.282864	2.8	10.2	592.8	697.6	Zhang et al. 2021
130	Xiaorequanzi	granodiorite porphyry	362.6	360.8	0.09675	0.002691	0.282872	3.1	10.5	563.9	670.4	Zhang et al. 2021
131	Xiaorequanzi	granodiorite porphyry	362.6	361.1	0.062183	0.002086	0.282878	3.3	10.8	546.3	648.3	Zhang et al. 2021
132	Xiaorequanzi	granodiorite porphyry	362.6	352.3	0.072002	0.002488	0.282917	4.7	11.9	494.5	570.4	Zhang et al. 2021
133	Xiaorequanzi	granodiorite porphyry	362.6	364.1	0.102495	0.002982	0.282872	3.1	10.5	568.9	673.8	Zhang et al. 2021
134	Xiaorequanzi	granodiorite porphyry	362.6	370.5	0.120119	0.004079	0.282892	3.8	11	556	642.3	Zhang et al. 2021
135	Xiaorequanzi	granodiorite porphyry	362.6	360.7	0.078259	0.002451	0.282858	2.6	10	580.5	697.9	Zhang et al. 2021
136	Xiaorequanzi	granodiorite porphyry	362.6	371	0.080874	0.002566	0.282846	2.2	9.8	600.5	722	Zhang et al. 2021
137	Xiaorequanzi Formation	Lithic tuff	364.4	367.3	0.110926	0.00289	0.282747	-1.4	6.1	754.1	953.2	Zhang et al. 2021
138	Xiaorequanzi Formation	Lithic tuff	364.4	348.1	0.032077	0.00098	0.282802	0.6	8.1	637.3	809.8	Zhang et al. 2021
139	Xiaorequanzi Formation	Lithic tuff	364.4	364.7	0.033981	0.000985	0.282745	-1.4	6.5	718.3	928.9	Zhang et al. 2021
140	Xiaorequanzi Formation	Lithic tuff	364.4	353.9	0.126617	0.003439	0.282951	5.9	12.9	456.6	507.2	Zhang et al. 2021
141	Xiaorequanzi Formation	Lithic tuff	364.4	368.7	0.057563	0.001684	0.282779	-0.2	7.6	683.3	861.5	Zhang et al. 2021
142	Xiaorequanzi Formation	Lithic tuff	364.4	373	0.054492	0.001694	0.282934	5.3	13.1	459.9	509.2	Zhang et al. 2021
143	Xiaorequanzi Formation	Lithic tuff	364.4	360.5	0.025703	0.000748	0.282838	1.9	9.7	583.2	718.3	Zhang et al. 2021
144	Xiaorequanzi Formation	Lithic tuff	364.4	360.5	0.189336	0.004802	0.282764	-0.7	6.1	769.2	946.4	Zhang et al. 2021
145	Xiaorequanzi Formation	Lithic tuff	364.4	376.8	0.116315	0.003142	0.282778	-0.2	7.4	712.1	881.2	Zhang et al. 2021
146	Xiaorequanzi Formation	Lithic tuff	364.4	379	0.083922	0.002759	0.282735	-1.8	6	768.8	971.7	Zhang et al. 2021
147	Xiaorequanzi Formation	dacite	365.8	361.1	0.055985	0.001548	0.282919	4.8	12.4	478.4	545.7	Zhang et al. 2021
148	Xiaorequanzi Formation	dacite	365.8	364.5	0.079493	0.00223	0.282967	6.4	14	417.7	446.8	Zhang et al. 2021
149	Xiaorequanzi Formation	dacite	365.8	367.1	0.061128	0.002017	0.282927	5	12.7	473	531.6	Zhang et al. 2021
150	Xiaorequanzi Formation	dacite	365.8	366.7	0.080234	0.002449	0.282949	5.8	13.4	446.7	489.6	Zhang et al. 2021
151	Xiaorequanzi Formation	dacite	365.8	369.2	0.087181	0.002412	0.282922	4.9	12.5	485.7	548.2	Zhang et al. 2021
152	Xiaorequanzi Formation	dacite	365.8	367.1	0.0844	0.002338	0.282944	5.6	13.2	452.4	498.6	Zhang et al. 2021
153	Xiaorequanzi Formation	dacite	365.8	368.8	0.097102	0.002844	0.282933	5.2	12.8	474.8	529.8	Zhang et al. 2021
154	Xiaorequanzi Formation	dacite	365.8	363.7	0.085192	0.002798	0.28291	4.4	11.9	508.5	583.8	Zhang et al. 2021
155	Xiaorequanzi Formation	dacite	365.8	364.4	0.055463	0.001659	0.282955	6	13.7	428.2	464.5	Zhang et al. 2021
156	Xiaorequanzi Formation	dacite	365.8	365.9	0.056978	0.001612	0.282945	5.7	13.4	442.4	486.1	Zhang et al. 2021
157	Xiaorequanzi Formation	dacite	365.8	364	0.074008	0.00208	0.282932	5.2	12.8	466.8	523.4	Zhang et al. 2021
158	Xiaorequanzi Formation	dacite	365.8	364.3	0.255384	0.005488	0.282942	5.6	12.4	498.8	553.3	Zhang et al. 2021
159	Xiaorequanzi Formation	dacite	365.8	361.5	0.0897	0.002549	0.282979	6.9	14.3	402.8	424.7	Zhang et al. 2021
160	Xiaorequanzi Formation	dacite	365.8	363.6	0.113362	0.003129	0.282915	4.6	11.9	506.3	578.6	Zhang et al. 2021
161	Xiaorequanzi Formation	dacite	365.8	362	0.190796	0.005174	0.2829	4.1	10.9	560.6	643.8	Zhang et al. 2021
εHf(0) = [(176Hf/177Hf)S/(176Hf/177Hf)CHUR,0 − 1] · 10000;
εHf(t) = {[(176Hf/177Hf)S − (176Lu/177Hf)S · (eλt − 1)] / [(176Hf/177Hf)CHUR,0 − (176Lu/177Hf)CHUR,0 · (eλt − 1)] − 1} · 10000;
TDM1 = 1/λ · ln{1 + [(176Hf/177Hf)S − (176Hf/177Hf)DM] / [(176Lu/177Hf)S − (176Lu/177Hf)DM];
TDM2 = TDM1 − (TDM1 − t) · (ƒcc − ƒs) · (ƒcc − ƒDM);
ƒLu/Hf = [(176Lu/177Hf)S/(176Lu/177Hf)CHUR,0] − 1;
where, (176Hf/177Hf)S and (176Lu/177Hf)S are measures values of samples, s = sample, t = crystallization time of zircon; (176Lu/177Hf)CHUR,0 = 0.0332 and (176Hf/177Hf)CHUR,0 = 0.282772 (Blichert-Toft and Albarède 1997); (176Lu/177Hf)DM = 0.0384 and (176Hf/177Hf)DM = 0.28325 (Griffin et al. 2000); ƒcc = ﹣0.55 and ƒDM = 0.16; λ = 1.867 × 10-12 / yr- 1 (Söderlund et al. 2004) was used in the calcula…
References:
Blichert-Toft, J., Albarède, F., 1997. The Lu-Hf isotope geochemistry of chondrites and the evolution of the mantle-crust system: Earth and Planetary Science Letters. v. 148, p. 243–258. doi: 10.1016/S0012-821X(97)00040-X.
Du, L., Zhang, Y.Y., Huang, Z.Y., Li, X.P., Yuan, C., Wu, B., Long, X.P. 2019. Devonian to carboniferous tectonic evolution of the Kangguer Ocean in the Eastern Tianshan, NW China: Insights from three episodes of granitoids: Lithos. v. 350, p. 105243. doi: 10.1016/j.lithos.2019.105243.
Griffin, W.L., Wang, X., Jackson, S.E., Pearson, N.J., O'Reilly, S.Y., Xu, X.S., Zhou, X.M., 2002. Zircon chemistry and magma mixing, SE China: in-situ analysis of Hf isotopes, Tonglu and Pingtan igneous complexes: Lithos. v. 61, p. 237–269. doi: 10.1016/S0024-4937(02)00082-8.
Han, Z.K., Han, C.M., Xiao, W.J., Zhao, G.C., Wang, Z.M., Ao, S.J., Zhang, J.E., Wan, B., 2013. Palaeozoic porphyry Cu–Au and ultramafic Cu–Ni deposits in the eastern Tianshan orogenic belt: temporal constraints from U–Pb geochronology: International Geology Review. v. 55, p. 842–862. doi: 10.1080/00206814.2012.745977.
Mao, Q.G., Xiao, W.J., Ao, S.J., Li, R., Wang, H., Tan, Z., Tan, W., 2022. Late Devonian to early Carboniferous roll-back related extension setting for the Tuwu-Yandong porphyry copper metallogenic belt in the Dananhu arc of the eastern Tianshan (NW China) in the southern Altaids: Ore Geology Reviews, p. 105060. doi: 10.1016/j.oregeorev.2022.105060.
Söderlund, U., Patchett, P.J., Vervoort, J.D., Isachsen, C.E., 2004. The 176Lu decay constant determined by Lu–Hf and U–Pb isotope systematics of Precambrian mafic intrusions: Earth and Planetary Science Letters. v. 219, p. 311–324. doi: 10.1016/S0012-821X(04)00012-3.
Wang, Y.H., Xue, C.J., Liu, J.J., Wang, J.P., Yang, J.T., Zhang, F.F., Zhao, Z.A., Liu, B., 2015b. Early Carboniferous adakitic rocks in the area of the Tuwu deposit, eastern Tianshan, NW China: Slab melting and implications for porphyry copper mineralization: Journal of Asian Earth Sciences. v. 103, p. 332–349. doi: 10.1016/j.jseaes.2014.09.032.
Wang, Y.H., Xue, C.J., Liu, J.J., Wang, J.P., Yang, J.T., Zhang, F.F., Zhao, Z.N., Zhao, Y.J., 2014. Geochemistry, geochronology, Hf isotope, and geological significance of the Tuwu porphyry copper deposit in eastern Tianshan, Xinjiang: Acta Petrologica Sinica. v. 30, p. 3383–3399(in Chinese with English abstract).
Wang, Y.H., Xue, C.J., Liu, J.J., Zhang, F.F., 2018. Origin of the subduction-related Carboniferous intrusions associated with the Yandong porphyry Cu deposit in eastern Tianshan, NW China: constraints from geology, geochronology, geochemistry, and Sr-Nd-Pb-Hf-O isotopes: Mineralium Deposita. v. 53, p. 629–647. doi: 10.1007/s00126-017-0763-3.
Wang, Y.H., Xue, C.J., Wang, J.P., Peng, R.M., Yang, J.T., Zhang, F.F., Zhao, Z.A., Zhao, Y.J., 2015a. Petrogenesis of magmatism in the Yandong region of Eastern Tianshan, Xinjiang: Geochemical, geochronological, and Hf isotope constraints: International Geology Review. v. 57, p. 1130–1151. doi: 10.1080/00206814.2014.900653.
Xiao, B., Chen, H.Y ., Hollings, P ., Han, J.S., Wang, Y .F., Y ang, J.T., Cai, K.D., 2017. Magmatic evolution of the Tuwu–Y andong porphyry Cu belt, NW China: Constraints from geochronology, geochemistry and Sr-Nd-Hf isotopes: Gondwana Research. v. 43, p. 74–91. doi: 10.1016/j.gr.2015.09.003.
Zhang, Z.X., Li, N., Geng, X.X., Wang, J.L., Wang, W., An, S.L., Zhang, Z.L., 2021. Fluid inclusions, isotopes, and geochronology data constraints on the mineralization of the Carboniferous volcanogenic massive sulfide Xiaorequanzi Cu–Zn deposit in the East Tianshan, NW China: Ore Geology Reviews. v. 139, p. 104505. doi: 10.1016/j.oregeorev.2021.104505.

## Sheet: Zircon trace element
Supplement. Zircon trace element data of Early Carboniferous magmatic rocks in the Dananhu Arc.
No	Location	Rock type	Ti	La	Ce	Pr	Nd	Sm	Eu	Gd	Tb	Dy	Ho	Er	Tm	Yb	Lu	U	Th	Hf	Dy/Yb	(La/Yb)N	Age(Ma)	T（℃）	EuN/EuN*	CeN/CeN*	logfO2	ΔFMQ	Ce4+/Ce3+	Reference
Middle segment
1	Yandong	granodiorite porphyry	7.18	0.11	16.2	0.08	0.89	3.87	1.13	28.3	12.4	172	72.4	366	90	965	214	229	73		0.178238	8.17647e-05	328	741.663	0.330106	184.347	-7.34377	0.796952		Xiao et al. 2017
2	Yandong	granodiorite porphyry	2.26	0.026	13.2	0.061	1.15	3.23	0.93	27.4	12.4	181	76.8	376	89.5	903	189	226	75		0.200443	2.06531e-05	303	644.289	0.302225	75.0882	-16.1639	1.41782		Xiao et al. 2017
3	Yandong	granodiorite porphyry	3.06	0.006	12.5	0.025	0.81	2.65	0.77	22.9	10.4	150	64.1	323	75.4	765	166	144	41		0.196078	5.62588e-06	319	667.964	0.302186	117.592	-13.051	1.44667		Xiao et al. 2017
4	Yandong	granodiorite porphyry	2.6	0	9.6	0.019	0.41	1.43	0.38	13.2	5.69	84.1	39.3	204	51.5	547	126	104	29		0.153748		328	655.088	0.267394	190.209	-12.0118	1.41305		Xiao et al. 2017
5	Yandong	granodiorite porphyry	3.46	0.01	27.2	0.088	1.66	5	1.23	30.6	12.1	151	60.2	278	61.9	611	132	189	167		0.247136	1.17398e-05	317	677.913	0.304007	114.951	-12.5575	2.38921		Xiao et al. 2017
6	Yandong	granodiorite porphyry	2.53	0	13.6	0.029	0.8	3.19	0.75	25.5	11.5	171	77.2	407	100	1064	237	209	57		0.160714		329	652.965	0.254226	157.885	-12.8401	1.43398		Xiao et al. 2017
7	Yandong	granodiorite porphyry	2.53	0.043	15.6	0.098	1	3.82	0.93	33.6	15.5	240	106	538	127	1266	272	283	64		0.189573	2.43633e-05	322	652.965	0.25096	138.797	-13.3242	1.41179		Xiao et al. 2017
8	Yandong	granodiorite porphyry	2.51	0.023	9.1	0.056	0.78	2.08	0.6	20.7	9.56	142	62.2	324	77.7	789	174	208	55		0.179975	2.09099e-05	320	652.35	0.279549	72.4614	-15.8034	0.793145		Xiao et al. 2017
9	Yandong	granodiorite porphyry	4.13	0.67	21.9	0.32	2.31	3.34	0.83	23	8.94	128	56.4	271	63.1	628	138	161	100		0.203822	0.000765272	332	692.623	0.289511	31.927	-16.5364	2.02124		Xiao et al. 2017
10	Yandong	granodiorite porphyry	1.76	0.007	6.7	0.019	0.4	1.62	0.46	15.3	7.48	115	53.3	295	75.9	822	190	138	23		0.139903	6.10839e-06	326	625.634	0.282474	158.001	-14.5471	0.91637		Xiao et al. 2017
11	Yandong	granodiorite porphyry	2.28	0.016	12.1	0.064	1.04	3.57	0.85	30.3	13.2	200	88.1	442	106	1092	236	224	63		0.18315	1.05099e-05	323	644.961	0.249854	93.0203	-15.3178	1.27333		Xiao et al. 2017
12	Yandong	granodiorite porphyry	3.3	0.004	18.5	0.074	1.42	5.02	1.51	41.7	18.6	259	109	518	120	1183	248	308	131		0.218935		317	674.054	0.319066	107.273	-13.0403	1.40499		Xiao et al. 2017
13	Yandong	granodiorite porphyry	4.13	0.004	14.4	0.049	1.97	6.58	1.88	60.1	25	336	138	652	149	1471	303	262	88		0.228416		315	692.623	0.289022	56.8652	-14.3678	0.947529		Xiao et al. 2017
14	Yandong	dioritic porphyrite	10.1	5.4	22.8	1.8	10.7	5.6	0.7	22.5	7.2	96.5	38.6	186.6	40.1	397.4	84	114	80		0.242828	0.0097469	346.4	774.487	0.19065	2.59744	-21.749	1.63843		Xiao et al. 2017
15	Yandong	dioritic porphyrite	11.6	0.7	12.9	0.4	2.1	3	0.6	17.1	6.6	83.9	34.7	163.2	37.3	362.2	77	127	90		0.23164	0.00138628	345.2	788.42	0.256104	20.4392	-13.3465	0.513399		Xiao et al. 2017
16	Yandong	dioritic porphyrite	6.8	0.2	16.9	0.4	4.3	6	1.2	33.5	12.5	161.4	66.6	312.1	69.3	663.1	137.8	282	206		0.243402	0.000216347	347.6	736.621	0.258766	12.773	-17.6289	0.737595		Xiao et al. 2017
17	Yandong	tonalite	2.5	0	18.6	0	0.8	2.2	0.7	21.2	9	128.6	56.9	295.4	70.8	746.9	165.6	246	77		0.172178		338.4	652.04	0.313359	148.918	-13.116	1.81832	737	Xiao et al. 2017
18	Yandong	tonalite	2.7	0.1	9.1	0	0.5	2.1	0.5	14.6	5.7	83.8	36.4	191.8	48	515.9	115.8	93	27		0.162435	0.000139038	338.9	658.039	0.276063	178.038	-12.0824	1.38456	287	Xiao et al. 2017
19	Yandong	tonalite	3.3	0.1	18.3	0.1	2	4.5	1.3	29.3	11	148.6	61.7	298.8	69.2	694	153.8	153	77		0.214121	0.000103357	335.1	674.054	0.34612	47.9507	-16.0653	1.95264	166	Xiao et al. 2017
20	Yandong	tonalite	8.4	0	18.5	0.1	1.8	5.4	2.8	38	14.5	184	72.7	333.4	71.2	695.3	150.4	134	92		0.264634		337.2	756.499	0.597576	71.8144	-10.1462	1.31886	112	Xiao et al. 2017
21	Yandong	tonalite	2.9	0	13.4	0	0.9	3.6	1	27.4	11.6	164	71.4	356.8	84.6	858.5	184.1	164	59		0.191031		341.6	663.68	0.30782	138.712	-12.6835	1.49395	223	Xiao et al. 2017
22	Yandong	tonalite	3.4	0	17.9	0	0.8	2.6	0.7	18.9	7.7	109.5	46.8	239.8	57.2	593.1	131.3	148	71		0.184623		342.3	676.483	0.305284	169.37	-11.1838	1.91832	412	Xiao et al. 2017
23	Yandong	tonalite	4.2	0	14.1	0	0.5	2.3	0.7	16.3	6.9	92.1	39.4	200.4	47.5	489.5	111.9	116	64		0.188151		341	694.044	0.349513	302.133	-8.01393	1.55719	356	Xiao et al. 2017
24	Yandong	tonalite	1.5	0	8.7	0	0.4	2	0.6	15.4	6.7	89.6	40.5	206	48.6	511.4	115.4	92	29		0.175205		338	614.101	0.330521	253.291	-13.5271	1.79783	297	Xiao et al. 2017
25	Yandong	tonalite	2.2	0	10.2	0	0.5	1.9	0.5	15.2	6.5	93.6	41.2	212.1	51.9	569.9	120.2	119	41		0.164239		340.5	642.245	0.284443	180.553	-12.9945	1.53576	399	Xiao et al. 2017
26	Yandong	tonalite	4.9	0	16.6	0.1	1.4	4.8	1.8	34.5	14.2	191.7	81	399.2	91.4	928.6	197.4	184	89		0.20644		337.6	707.269	0.427628	94.6856	-11.6468	1.32299	167	Xiao et al. 2017
27	Yandong	tonalite	2	0	11.4	0.1	1.3	4.3	1.3	37.8	15.9	221	94.1	468.2	109.8	1120.1	238.4	206	60		0.197304		341.7	635.075	0.311736	67.5581	-17.1367	1.34797	169	Xiao et al. 2017
28	Yandong	tonalite	4.5	0	16.9	0.1	0.9	3.4	0.9	26.7	10.6	142.7	60.3	302.7	69.3	707.3	153.1	162	86		0.201753		336.2	699.919	0.288783	165.223	-9.95642	1.52489	263	Xiao et al. 2017
29	Yandong	tonalite	3.8	0.1	14.8	0.1	0.9	3.8	1.1	36.7	16.1	232.3	101.3	508.8	118.4	1187.1	243.6	281	64		0.195687		342.4	685.646	0.284768	161.715	-10.8336	0.998396	284	Xiao et al. 2017
30	Yandong	tonalite	3.9	0	14.5	0.1	1.2	4.9	1.3	39.9	16.8	234.1	100.3	504.8	117.6	1203.5	253.9	277	89		0.194516		339.5	687.812	0.284238	114.919	-11.9946	0.956148	178	Xiao et al. 2017
31	Yandong	tonalite	3.9	0	14.5	0.1	1.2	4.9	1.3	39.9	16.8	234.1	100.3	504.8	117.6	1203.5	253.9	277	44		0.194516		340.8	687.812	0.284238	114.919	-11.9946	0.955939	127	Xiao et al. 2017
32	Yandong	tonalite	3.9	0	14.5	0.1	1.2	4.9	1.3	39.9	16.8	234.1	100.3	504.8	117.6	1203.5	253.9	277	49		0.194516		338.4	687.812	0.284238	114.919	-11.9946	0.956325	181	Xiao et al. 2017
33	Yandong	tonalite	5.8	0.9	17.3	0.3	2.3	4.6	1.1	31.8	12.9	181.7	77.8	386.3	90.7	929.9	190.6	231	74		0.195397	0.000694236	338.6	722.157	0.278051	35.038	-14.5872	1.06823	184	Xiao et al. 2017
34	Yandong	tonalite	2.6	0.1	11.1	0.1	0.8	3	0.7	22.2	9	123.4	52.7	267.5	62.6	641.9	140.7	106	44		0.192242	0.000111746	365.9	655.088	0.262231	121.187	-13.7053	1.6273	205	Xiao et al. 2017
35	Fuxing	tonalite	6.07	0.279	23.54	0.145	1.43	5.06	1.236	28.83	11.8	160.93	63.71	293.72	75.36	933.44	186.963	142.77	98.86	8541.49	0.172405	0.000214397	340	726.252	0.312856	135.667	-9.28689	1.9221	251.795	Zhang et al. 2022
36	Fuxing	tonalite	4.09	0.07	15.5	0.091	1.5	3.35	1.096	19.81	7.43	98.44	38.34	173.36	44.27	525.9	107.3	111.85	97.09	8817.14	0.187184	9.54763e-05	339	691.803	0.41131	53.7508	-14.6252	1.76241	148.977	Zhang et al. 2022
37	Fuxing	tonalite	3.39	0.065	18.31	0.054	1.03	2.58	0.751	17.55	7.2	99.18	40.11	189.83	51.39	644.34	130.065	161.68	72.35	9599.52	0.153925	7.236e-05	339	676.243	0.341205	103.711	-13.0404	1.88623	336.32	Zhang et al. 2022
38	Fuxing	tonalite	4.48	0.106	13.58	0.078	1.08	2.83	0.858	17.74	7.29	101.58	41.33	198.93	52.76	649.15	136.256	79.04	37.91	8918.11	0.156482	0.000117128	339	699.537	0.370204	76.7414	-12.8584	1.75562	232.464	Zhang et al. 2022
39	Fuxing	tonalite	2.57	0.122	12.12	0.057	0.52	2.02	0.765	18.62	8.65	127.25	54.47	269.19	74.31	935.55	194.344	138.73	35.52	10874.3	0.136016	9.35391e-05	340	654.184	0.381346	210.881	-11.6788	1.56515	599.701	Zhang et al. 2022
40	Fuxing	tonalite	3.6	0.093	13.98	0.058	0.65	2.5	0.776	17.68	7.88	114.84	50.24	236.35	65.36	825.32	169.462	114.69	38.52	9663.42	0.139146	8.08279e-05	339	681.17	0.356841	192.669	-10.4304	1.67804	471.299	Zhang et al. 2022
41	Fuxing	tonalite	3.81	0.063	20.86	0.08	1.14	3.85	1.379	22.63	8.44	110.43	43.7	205.41	53.96	679.03	147.044	138.53	81.97	8952.95	0.162629	6.65506e-05	339	685.865	0.451664	143.932	-11.2589	2.12866	275.931	Zhang et al. 2022
42	Fuxing	tonalite	5.1	0.082	23.41	0.054	1.33	3.84	1.143	23.92	9.56	125.46	49.66	225.17	58.4	706.36	145.334	136.33	118.54	8594.96	0.177615	8.327e-05	339	710.761	0.364606	118.364	-10.6198	2.09216	270.304	Zhang et al. 2022
43	Fuxing	tonalite	4.58	0.047	15.62	0.037	1.051	3.19	0.88	20.93	8.98	126	52.38	247.33	65.42	806.46	166.431	92.96	42.63	9010.12	0.156238	4.18038e-05	339	701.431	0.32925	105.065	-11.5742	1.83328	283.329	Zhang et al. 2022
44	Fuxing	tonalite	3.96	0.061	17.52	0.053	1.66	5.19	1.235	36.25	15.62	217.24	89.58	417.77	111.85	1365.23	273.745	263.78	134.5	9490.79	0.159123	3.20497e-05	338	689.089	0.275266	76.8557	-13.4341	1.29101	199.681	Zhang et al. 2022
45	Fuxing	tonalite	3.46	0.054	16.17	0.045	0.94	4.18	1.061	32.65	15.11	220.71	92.01	436.9	118.6	1454.89	293.553	328.99	123.14	9536.52	0.151702	2.66234e-05	339	677.913	0.277657	178.165	-10.9113	1.09081	368.926	Zhang et al. 2022
46	Fuxing	tonalite	2.61	0.053	7.67	0.041	0.663	1.78	0.601	9.45	3.74	48	19.92	97.3	27.6	362.48	82.708	52.63	23.99	9193.55	0.132421	0.00010488	339	655.387	0.447994	72.3401	-15.6256	1.59675	208.13	Zhang et al. 2022
47	Fuxing	tonalite	4.56	0.057	27.89	0.067	1.17	3.54	1.266	23.58	9.12	116.79	45.04	203.91	52.22	618.51	132.69	164.42	184.35	9084.47	0.188825	6.61041e-05	337	701.055	0.423627	167.985	-9.83174	2.31564	347.267	Zhang et al. 2022
48	Fuxing	tonalite	3.09	0.428	16.23	0.19	1.41	2.91	0.706	16.11	6.61	90.25	36.4	169.46	44.68	563.25	116.87	130.05	78.41	9645.42	0.160231	0.000545059	339	668.746	0.315235	55.3304	-15.8373	1.94242	199.311	Zhang et al. 2022
49	Fuxing	tonalite	3.61	0.055	13.01	0.047	0.622	1.87	0.706	14.37	6.27	86.22	36.73	173.61	47.1	602.1	122.612	73.69	28.78	8694.65	0.143199	6.55231e-05	339	681.399	0.41637	146.463	-11.4474	1.91825	447.108	Zhang et al. 2022
50	Fuxing	tonalite	3.75	0.058	12.86	0.041	0.54	2.55	0.65	16.97	7.26	101.86	41.79	197.73	52.2	662.1	135.372	76.98	37.35	8648.93	0.153844	6.28355e-05	339	684.546	0.302083	261.93	-9.08429	1.83304	430.608	Zhang et al. 2022
51	Fuxing	tonalite	5.03	0.111	11.31	0.101	1.26	3.32	0.615	18.9	7.6	99.82	40.92	185.3	47.87	590.1	116.45	98.54	65.63	8443.63	0.169158	0.000134927	339	709.552	0.237355	55.0872	-13.5583	1.1854	138.12	Zhang et al. 2022
52	Fuxing	tonalite	3.48	0.081	13.17	0.058	0.62	2.73	0.714	15.33	6.54	91.48	37.85	180.09	49.06	622.79	124.801	96.61	37.95	9539.51	0.146887	9.32919e-05	339	678.385	0.337419	217.849	-10.1286	1.74795	371.458	Zhang et al. 2022
53	Fuxing	tonalite	3.6	0.069	18.32	0.049	0.78	2.76	0.74	18.38	8.07	120.07	50.77	252.65	70.52	915.3	188.543	143.01	55.94	9701.73	0.131181	5.40737e-05	338	681.17	0.317635	193.569	-10.4128	1.93812	532.217	Zhang et al. 2022
54	Fuxing	tonalite	3.39	0.077	13.38	0.08	0.7	2.56	0.778	18.01	8.24	119.29	50.45	248.16	69.28	855.86	178.988	106.99	34.63	9213.18	0.13938	6.4534e-05	338	676.243	0.350289	162.814	-11.346	1.7122	429.148	Zhang et al. 2022
55	Fuxing	tonalite	6.21	0.065	34.67	0.118	3.09	9.61	2.81	57.2	20.93	257.66	97.2	426.31	105.26	1230.97	238.728	178.5	146.1	8490.48	0.209315	3.78762e-05	339	728.317	0.366412	81.2739	-11.1044	2.35122	130.193	Zhang et al. 2022
Western segment
1	Xiaorequanzi Formation	rhyolite	15.576	0	12.4921	0.0553153	1.2271	3.06773	0.563699	15.364	4.96467	55.7799	21.3562	94.7819	20.0282	182.606	37.5798	59.7305	48.0392	16602.2	0.305466		342.7	864.833	0.251022	59.2769	-9.32103	0.675	78.9669	This study
2	Xiaorequanzi Formation	rhyolite	13.0484	0	12.685	0.0430059	1.00146	2.46753	0.455095	13.9024	4.39657	50.6563	19.9944	87.16	18.1371	165.064	33.5888	61.2149	46.2377	14276.1	0.306888		347.9	844.464	0.237546	72.6897	-9.3891	0.834013	103.729	This study
3	Xiaorequanzi Formation	rhyolite	10.4332	0	13.8809	0.0378027	1.09318	2.18719	0.317161	12.7478	4.68132	52.5323	20.4619	93.1541	20.4226	179.537	38.6191	62.3952	45.1468	20139.3	0.292598		340.3	819.752	0.183629	59.1712	-11.2162	1.16805	124.348	This study
4	Xiaorequanzi Formation	rhyolite	10.174	0.0125857	14.8239	0.100401	2.14831	5.85104	0.935201	28.8398	9.36406	104.192	38.3448	160.25	31.8143	276.545	55.1384	77.4534	78.3268	15179.4	0.376763	3.26447e-05	344.2	817.04	0.220098	43.7715	-12.4673	1.11632	44.084	This study
5	Xiaorequanzi Formation	rhyolite	13.9126	0.00847087	13.0533	0.104754	2.35702	4.30435	0.786464	23.1639	6.82431	81.9641	30.5799	133.78	27.4604	247.601	51.4114	67.387	58.621	19018	0.331033	2.45401e-05	343.3	851.756	0.240793	23.5556	-13.3203	0.744647	42.7277	This study
6	Xiaorequanzi Formation	rhyolite	13.0868	0.00726022	14.0897	0.231033	3.5389	5.52098	1.07682	26.8517	8.62706	95.2897	35.2674	153.402	31.5339	282.259	58.1141	81.5786	74.2525	18436	0.337597	1.84503e-05	340.5	844.796	0.270379	14.4667	-15.4402	0.7645	28.9981	This study
7	Xiaorequanzi Formation	rhyolite	12.4382	0	13.7299	0.0487725	0.95222	2.4723	0.514221	12.7967	4.41708	54.3024	21.4008	95.5455	19.878	177.959	37.5535	65.7633	50.0503	19327.9	0.305141		343.2	839.078	0.279495	87.1936	-8.93132	0.950817	129.534	This study
8	Xiaorequanzi Formation	rhyolite	7.85898	0	17.095	0.0211193	1.49606	3.32949	0.501086	19.9949	6.74834	81.1	31.4358	143.903	30.8385	294.377	60.4728	138.897	99.9036	22505.2	0.275497		343.7	789.974	0.187753	59.2294	-12.5478	1.08092	113.141	This study
9	Xiaorequanzi Formation	rhyolite	12.4254	0.0947843	15.2282	0.229458	4.32145	7.1968	1.29959	35.0771	10.8646	119.141	43.2533	184.851	37.5014	323.825	65.2901	81.8154	84.5099	17800.5	0.367918	0.000209955	340	838.963	0.250062	13.6685	-15.8978	0.941931	22.9465	This study
10	Xiaorequanzi Formation	rhyolite	15.3295	0.362558	13.5328	0.111859	1.94604	3.16173	0.749289	18.6897	6.01678	71.2073	26.4214	119.636	24.5228	222.128	44.0867	75.7751	65.0268	16457.6	0.320569	0.00117078	346.1	862.968	0.297995	26.3146	-12.4471	0.62123	60.3847	This study
11	Xiaorequanzi Formation	rhyolite	14.7326	0.0265478	16.1119	0.312383	5.433	8.45231	1.30796	37.6357	12.1846	137.242	49.301	212.616	42.1916	363.641	72.0483	94.6975	101.61	16733.6	0.377411	5.23668e-05	341.8	858.349	0.224197	10.7457	-15.999	0.765075	19.1839	This study
12	Xiaorequanzi Formation	rhyolite	8.06583	0	16.581	0.246443	2.4495	6.23651	0.970304	31.4622	9.68508	107.934	39.1446	173.851	35.2682	314.545	62.3757	113.523	100.16	18921.5	0.343144		343.3	792.636	0.211771	40.1409	-13.8868	1.18049	45.4271	This study
13	Xiaorequanzi Formation	rhyolite	16.6552	0.00387703	13.3535	0.132276	1.89941	3.80512	0.792127	20.2704	6.7418	77.1021	28.6437	129.941	27.0358	250.489	52.413	82.029	61.0905	16843.7	0.307806	1.11023e-05	343.9	872.735	0.275742	32.8032	-11.2282	0.457215	58.9103	This study
14	Xiaorequanzi Formation	rhyolite	12.2826	0	14.189	0.176513	2.99875	5.53837	1.03947	28.0363	8.92547	98.9801	36.2045	156.163	32.3726	284.029	57.3328	86.1171	76.1436	17123.6	0.348486	0	344.3	837.672	0.255026	20.3537	-14.4564	0.78476	33.3665	This study
15	Xiaorequanzi Formation	rhyolite	15.7844	0.0572579	18.2528	0.495745	6.59305	9.09429	1.93777	44.929	14.7295	172.692	64.6293	286.848	57.3306	493.09	99.8625	176.095	183.125	16888.6	0.350225	8.32933e-05	340.9	866.393	0.293075	8.89441	-16.3844	0.383277	21.2745	This study
16	Xiaorequanzi Formation	rhyolite	12.4303	0.00244642	14.8487	0.290142	4.21772	7.16558	1.24259	34.7942	10.7775	117.484	43.3432	188.119	37.7646	322.02	63.6922	92.208	94.9074	14462.5	0.364834	5.4494e-06	344.5	839.008	0.240587	13.9308	-15.8245	0.793951	22.8837	This study
17	Xiaorequanzi Formation	rhyolite	8.65604	0.015954	18.2177	0.23468	4.65787	7.49371	1.34528	38.9005	11.4385	127.586	45.9287	196.188	40.23	344.716	69.9372	112.632	107.473	19314.9	0.370119	3.31977e-05	343.7	799.942	0.240885	14.6557	-17.3393	1.28947	25.7492	This study
18	Xiaorequanzi Formation	rhyolite	9.96326	0	13.4634	0.0627242	0.892355	2.09928	0.500853	14.173	4.75254	56.2443	21.7965	98.3735	20.6601	186.325	39.1662	68.6304	51.0075	19735.8	0.301862		347.5	814.794	0.280716	82.6688	-10.1771	1.07235	145.635	This study
19	Xiaorequanzi Formation	rhyolite	13.8237	0	12.893	0.0448505	1.49599	2.99809	0.50409	15.8492	5.21226	61.3756	23.1502	105.387	22.9853	202.661	41.1101	69.2317	52.6199	19474.2	0.302848		344	851.023	0.223566	40.2283	-11.3398	0.705305	74.5246	This study
20	Xiaorequanzi Formation	rhyolite	11.4404	0.0268441	13.2181	0.224625	3.90859	7.07784	1.21424	30.8495	9.66395	106.563	39.5173	166.554	33.192	286.885	57.6802	79.7437	80.1119	13489.7	0.371449	6.71185e-05	343.9	829.8	0.251219	14.2633	-16.127	0.790101	20.8831	This study
21	Xiaorequanzi Formation	rhyolite	10.989	0.00360588	13.607	0.126389	2.47261	4.12037	0.790621	21.8224	7.24657	85.4645	32.8824	143.941	29.9281	269.546	55.7819	91.9735	71.8165	19925.2	0.317069	9.59578e-06	339.1	825.388	0.254902	21.3589	-14.7997	0.751527	47.264	This study
22	Xiaorequanzi	monzogranite	8.45	0.97	12.15	0.11	1.48	2.44	0.66	16.17	6.82	87.48	39.95	194.14	42.81	410.41	95.27	239.03	166	19295	0.213153	0.0017	334.3	797.394	0.32	31.74	-14.5518	-0.04	137.36	This study
23	Xiaorequanzi	monzogranite	7.28	0	13.11	0.09	1.18	3.37	0.7	27	9.85	131.27	55.69	261.95	57.15	534.2	117.51	280.61	240	20950	0.245732	1e-05	336.8	782.189	0.22	73.803	-12.0828	0.08	154.72	This study
24	Xiaorequanzi	monzogranite	6.98	0.24	7.71	0.07	0.54	1.26	0.37	12.43	4.72	66.32	28.66	142.67	32.49	321.87	74.13	156.15	95.4	20115	0.206046	0.00054	331.1	777.986	0.28	77.909	-12.0768	-0.29	273.25	This study
25	Xiaorequanzi	monzogranite	9.13	0.04	12.84	0.07	0.98	2.52	0.65	20.09	7.96	111.88	49.8	241.82	53.85	527.13	117.4	244.62	175	15174	0.212244	5e-05	327.3	805.524	0.28	78.14	-10.8003	-0.03	226.81	This study
26	Xiaorequanzi	monzogranite	9.82	0.27	8	0.2	1.22	1.95	0.36	13.19	5.01	66.01	27.54	136.55	30.28	296.17	67.16	109.49	70.8	18049	0.222879	0.00066	333.9	813.195	0.22	24.473	-14.8207	-0.22	100.6	This study
27	Xiaorequanzi	monzogranite	9.5	6.64	25.58	2.08	10.61	4.53	0.46	18.1	6.43	90.54	38.42	186.63	42.49	404.38	88.24	226.9	146	15239	0.223898	0.01178	331.8	809.714	0.16	2.399	-23.7002	1.2	35.3	This study
28	Xiaorequanzi	monzogranite	13.31	0.43	21.67	0.44	4.68	6.12	1.21	37.38	13.97	183.28	76.11	353.98	76.58	707.61	147.75	336.5	316	19727	0.259013	0.00044	338.1	846.744	0.24	14.094	-15.4572	0.27	60.53	This study
29	Xiaorequanzi	monzogranite	3.7	0.46	9.7	0.16	0.92	1.37	0.27	8.91	3.35	46.77	21.16	111.38	27.17	284.88	67.94	304.12	190	17414	0.164174	0.00116	333.9	718.059	0.24	36.27	-17.9459	0.08	213.32	This study
30	Xiaorequanzi	monzogranite	7.09	0.35	9.19	0.12	1.1	1.78	0.27	10.13	3.89	53.06	22.42	107.01	23.63	227.79	49.02	133.86	109	13985	0.232934	0.00111	332.2	779.507	0.19	31.737	-15.379	0.13	118.56	This study
31	Xiaorequanzi	monzogranite	5.22	0.43	15.99	0.28	2.71	4.66	0.73	32.52	11.83	151.42	63.07	299.45	64.78	609.79	127.24	326.81	277	17658	0.248315	0.00051	334	749.716	0.18	23.599	-17.9337	0.58	77.89	This study
32	Xiaorequanzi	monzogranite	6.5	0.03	9.19	0.05	0.79	1.63	0.36	13.86	5.62	73.29	34.31	167.4	38.93	393.18	88.21	222.66	124	19623	0.186403	6e-05	335.4	770.978	0.23	56.387	-13.6241	-0.24	224.3	This study
33	Xiaorequanzi	monzogranite	10.61	0.3	17.53	0.53	5.16	5.68	1.07	38.24	13.4	165.27	65.91	295.35	61.31	571.4	116.5	262.43	278	18093	0.289237	0.00037	331.8	821.594	0.22	8.72	-18.3299	0.32	38.58	This study
34	Xiaorequanzi	monzogranite	9.67	5.25	25.84	1.75	9.75	4.53	0.68	22.21	7.72	101.79	43.34	211.23	45.16	445.99	99.65	246.35	185	18651	0.228234	0.00844	333	811.651	0.21	2.871	-22.9395	1.13	38.31	This study
35	Xiaorequanzi	monzogranite	7.21	0	10.52	0.01	0.4	1.62	0.18	10.97	4.65	61.29	25.6	125.81	27.6	268.66	58.12	197.55	151	20681	0.228132	0	330.6	781.19	0.13	243.82	-7.64002	0.01	374.27	This study
36	Xiaorequanzi	monzogranite	9.29	0.82	12.26	0.26	1.74	2.55	0.48	21.14	7.65	102.48	44.16	215.34	46.96	444.43	97.58	209.31	155	18693	0.230587	0.00133	331.6	807.397	0.2	24.021	-15.148	0.01	114.08	This study
37	Xiaorequanzi	monzogranite	6.98	2.6	30.7	1.77	9.85	8.19	1.45	39.25	12.59	166.93	66.65	318.93	66.12	641.17	135.06	397.68	379	19274	0.260352	0.00291	332.9	777.94	0.25	6.038	-21.6873	1.29	34.89	This study
38	Xiaorequanzi	moyite	12.9	0.05	27.65	0.14	2.52	4.17	0.5	30.26	11.55	144.67	58.88	263.28	53.91	479.67	96.09	467.67	562	13409	0.301603	7e-05	342.2	843.193	0.135	42.26	-11.48	0.44	130.01	This study
39	Xiaorequanzi	moyite	10.99	0.76	12.79	0.43	3.73	5.31	0.86	27.59	9.29	110.97	44.02	200.88	42.41	380.68	78.41	458.89	192	17912	0.291505	0.00144	346.9	825.442	0.217	11.39	-17.16	-0.75	32.31	This study
40	Xiaorequanzi	moyite	2.85	0.03	17.35	0.02	1.26	1.94	0.08	14.32	6.37	81.79	36.85	176.54	40.18	381.73	83.1	606.32	332	27281	0.214261	6e-05	343.3	695.426	0.044	49.66	-17.99	0.71	247.01	This study
41	Xiaorequanzi	moyite	23	0.25	17.84	0.17	1.52	2.6	0.28	15.13	5.71	76.78	31.86	156.19	33.4	298.08	64.58	442.51	443	12347	0.257582	0.0006	342	912.418	0.136	46.95	-8.36	-0.78	154.25	This study
42	Xiaorequanzi	moyite	6.62	0	18.02	0.05	1.32	2.5	0.26	18.57	6.86	87.84	36.19	167.01	35.74	331.38	66.22	337.4	267	16490	0.265073	0	344.6	772.649	0.118	60.71	-13.27	0.56	175.3	This study
43	Xiaorequanzi	moyite	14.8	0.1	25.66	0.28	4.72	8.4	1.15	56.28	18.53	222.68	85.56	370.46	76.26	658.86	128.73	464.04	560	14407	0.337978	0.00011	344.2	858.882	0.162	22.52	-13.2	0.19	48.65	This study
44	Xiaorequanzi	moyite	5.18	0.12	19.15	0.26	2.77	5.53	0.52	31.67	11.66	150.94	58.03	273.13	57.08	501.56	101.92	489.46	408	23119	0.300941	0.00017	343.6	749.066	0.12	32.03	-16.82	0.55	72.92	This study
45	Xiaorequanzi	moyite	5.79	0.05	18.83	0.15	3.12	6.02	0.65	40.59	14.4	174.05	68.78	311.87	63.04	562.39	111.89	437.98	404	22759	0.309483	6e-05	342.5	759.631	0.127	27.09	-16.93	0.52	60.73	This study
Ti-in-zircon temperatures are calculated using the equation proposed by Ferry and Watson 2007, where it is assumed that logaSiO2 = 1 due to the existence of quartz in the host rocks, and logaTiO2 = 0.75 due to the presence of titanite
Eu anomalies (EuN/EuN*) are calculated by EuN/(SmN × GdN)1/2, where "N" indicates chondrite-normalized values (Sun and McDonough 1989)
Ce anomalies (CeN/CeN*) are calculated by CeN/(NdN2/SmN) proposed by Loader et al. 2017.
LogfO2 values are calculated using the equation of Loucks et al. 2020.
FMQ values are calculated following the equation of Myers and Eugster (1983): logfO2 = –24,441.9/T (K) + 8.290 (± 0.167).
Ce4+/Ce3+ ratios are calculated following the method of Ballard et al. (2002), and calculated by software tool Geo-fO2 of Li et al. (2019)
References:
Ballard, J.R., Palin, M.J., Campbell, I.H., 2002. Relative oxidation states of magmas inferred from Ce (IV)/Ce (III) in zircon: application to porphyry copper deposits of northern Chile: Contributions to Mineralogy and Petrology. v. 144, p. 347–364. doi: 10.1007/s00410-002-0402-5.
Ferry, J.M., Watson, E.B., 2007. New thermodynamic models and revised calibrations for the Ti-in-zircon and Zr-in-rutile thermometers: Contributions to Mineralogy and Petrology. v. 154, p. 429–437. doi: 10.1007/s00410-007-0201-0.
Li, W.K., Cheng, Y.Q., Yang, Z.M., 2019. Geo-fO2: Integrated software for analysis of magmatic oxygen fugacity: Geochemistry, Geophysics, Geosystems. v. 20, p. 2542–2555. doi: 10.1029/2019GC008273.
Loader, M.A., Wilkinson, J.J., Armstrong, R.N., 2017. The effect of titanite crystallisation on Eu and Ce anomalies in zircon and its implications for the assessment of porphyry Cu deposit fertility: Earth and Planetary Science Letters. v. 472, p. 107–119. doi: 10.1016/j.epsl.2017.05.010.
Loucks, R.R., Fiorentini, M.L., Henríquez, G.J., 2020. New magmatic oxybarometer using trace elements in zircon: Journal of Petrology. doi: 10.1093/petrology/egaa034.
Myers, J.T., Eugster , H.P., 1983 The system Fe-Si-O: Oxygen buffer calibrations to 1,500 K: Contributions to Mineralogy and Petrology. v. 82, p. 75–90. doi: 10.1007/BF00371177.
Sun, S.S., McDonough, W.F., 1989. Chemical and isotopic systematics of oceanic basalts, implications for mantle composition and processes: Geological Society, London, Special Publication. v. 42, p. 313–345. doi: 10.1144/GSL.SP.1989.042.01.19.
Xiao, B., Chen, H.Y ., Hollings, P ., Han, J.S., Wang, Y .F., Y ang, J.T., Cai, K.D., 2017. Magmatic evolution of the Tuwu–Y andong porphyry Cu belt, NW China: Constraints from geochronology, geochemistry and Sr-Nd-Hf isotopes: Gondwana Research. v. 43, p. 74–91. doi: 10.1016/j.gr.2015.09.003.
Zhang, F.F., Wang, Y.H., Liu, J.J., Xue, C.J., Wang, J.P., Zhang, W., Li, Y.Y., 2022. Paleozoic magmatism and mineralization potential of the Sanchakou copper deposit, Eastern Tianshan, Northwest China: Insights from geochronology, mineral chemistry, and isotopes: Economic Geology. v. 117, p. 165-194. doi: 10.5382/econgeo.4859.

## Sheet: Sr-Nd isotope
Supplement. Whole-rock Sr-Nd isotope compositions of Early Carboniferous magmatic rocks in the Dananhu Arc.
No	Location	Rock type	Age (Ma)	Rb(ppm)	Sr(ppm)	87Rb /86Sr	87Sr/86Sr	(87Sr/86Sr)i	Sm(ppm)	Nd(ppm)	147Sm/144Nd	143Nd/144Nd	(143Nd/144Nd )i	εNd(t)	TDM1	TDM2	Reference
Middle segment
1	Yandong	Quartz albite porphyry	323.6	28	853	0.09	0.70412	0.703693	2.92	13.1	0.13	0.512786		5.42	700		Xiao et al. 2017
2	Yandong	Quartz albite porphyry	323.6	39	739	0.15	0.704258	0.703567	3.04	13.5	0.14	0.512771		5.07	750		Xiao et al. 2017
3	Yandong	tonalite	335.3	39.7	352	0.326578	0.705149	0.70359	2.27	11.6	0.118306	0.512728	0.512468	5.11075	679.201	678.099	Wang et al. 2018
4	Yandong	tonalite	335.3	38.8	285	0.394208	0.704756	0.702875	1.86	9.47	0.118741	0.512772	0.512512	5.96342	610.362	608.228	Wang et al. 2018
5	Yandong	tonalite	335.3	44.3	309	0.41513	0.705285	0.703303	2.32	15.7	0.0893363	0.51271	0.512514	6.0146	541.865	603.819	Wang et al. 2018
6	Yandong	tonalite	335.3	61.3	255	0.69608	0.705202	0.70188	1.07	5.11	0.126591	0.512819	0.512541	6.53084	584.15	561.781	Wang et al. 2018
7	Yandong	plagiogranite porphyry	339.3	51	140	1.05	0.709044	0.704281	6.7	1.42	0.13	0.512809		6.31			Xiao et al. 2017
8	Yandong	plagiogranite porphyry	340	19.89	472.7	0.1234	0.704377	0.70378	2.509	11.27	0.1347	0.512757	0.512457	5	545	569	Zhang et al. 2006
9	Tuwu	plagiogranite porphyry	335			0.0935	0.704	0.7036			0.1065	0.5128	0.5125	6.1	608	634	Guo 2021
10	Tuwu	plagiogranite porphyry	335			0.0565	0.7038	0.7035			0.1087	0.5127	0.5125	5.6	701	739	Guo 2021
11	Tuwu	plagiogranite porphyry	335			0.1021	0.7041	0.7036			0.108	0.5127	0.5124	4.4	631	663	Guo 2021
12	Tuwu	plagiogranite porphyry	335			0.0511	0.7039	0.7036			0.1077	0.5127	0.5125	5.3	849	876	Guo 2021
13	Tuwu	diorite porphyrite	338			0.1031	0.7038	0.7033			0.1129	0.5126	0.5123	2.7	429	430	Guo 2021
14	Tuwu	basalt	325			0.024	0.703996	0.703886			0.142	0.512805		5.5			Xia et al. 2004
15	Tuwu	basalt	325			0.0086	0.70392	0.703881			0.1149	0.512769		5.9			Xia et al. 2004
16	Tuwu	basalt	325			0.077	0.704122	0.703771			0.1392	0.512828		6.06			Xia et al. 2004
17	Tuwu	basaltic andesite	325			0.052	0.70403	0.703793			0.1493	0.512861		6.29			Xia et al. 2004
18	Tuwu	plagiogranite porphyry	340	39.75	630.1	0.1816	0.704286	0.70341	1.771	9.821	0.1092	0.512744	0.512501	5.9			Zhang et al. 2006
19	Tuwu	andesite	340	4.199	707.2	0.017	0.703713	0.70363	4.211	16.6	0.1535	0.512859	0.512507	6.2			Zhang et al. 2006
20	Tuwu	plagiogranite porphyry	340	30.89	320.8	0.2773	0.704783	0.70344	1.115	6.177	0.1093	0.512773	0.51253	6.4			Zhang et al. 2006
21	Tuwu	plagiogranite porphyry	340	37.67	552.1	0.1967	0.70425	0.7033	2.433	11.55	0.1275	0.512824	0.51254	6.6			Zhang et al. 2006
22	Tuwu	basalt	340	8.112	978.1	0.0238	0.703811	0.70369	4.294	20.1	0.1298	0.512855	0.512559	7.3			Zhang et al. 2006
23	Tuwu	plagiogranite porphyry	340	18.99	679.1	0.081	0.703898	0.70351	4.159	19.89	0.1266	0.512872	0.51259	7.6			Zhang et al. 2006
24	Tuwu	plagiogranite porphyry	369	65.08	293.2	0.6427	0.706739	0.70363			0.1038	0.51273		6.2			Rui et al. 2004
25	Qi’eshan Group	basalt	330			0.0941	0.704408	0.703966	0.1825	0.512895				5.61		1251	Cao 2012
26	Qi’eshan Group	basalt	330			0.5126	0.706573	0.704166	0.1132	0.512763				5.95		589	Cao 2012
27	Qi’eshan Group	andesite	330			0.1067	0.704549	0.704048	0.1565	0.512857				5.96		784	Cao 2012
28	Qi’eshan Group	basalt	330			0.0743	0.704419	0.70407	0.1773	0.512938				6.66		894	Cao 2012
29	Qi’eshan Group	rhyolite	335			0.295	0.70662				0.1274	0.512769		5.39			Li et al. 2004
30	Qi’eshan Group	basalt	335			0.077	0.704122				0.1392	0.512828		6.06			Li et al. 2004
31	Qi’eshan Group	basaltic andesite	335			0.052	0.70403				0.14932	0.512861		6.29			Li et al. 2004
32	Qi’eshan Group	rhyolite	335			0.848	0.70797				0.1009	0.512768		6.45			Li et al. 2004
33	Qi’eshan Group	basalt	335			0.024	0.703996				0.1275	0.512853		7.03			Li et al. 2004
34	Qi’eshan Group	basalt	335			0.011	0.70355				0.1709	0.513023		8.57			Li et al. 2004
35	Qi’eshan Group	basalt	336.9	9.958	648.6	0.0441	0.703743	0.70353	5.452	23.47	0.1407	0.512793		5.42			Hou 2006
36	Qi’eshan Group	basalt	336.9	5.487	843.6	0.0186	0.703663	0.70357	5.766	24.99	0.1397	0.512795		5.5			Hou 2006
37	Qi’eshan Group	andesite	336.9	51.6	249.8	0.593	0.703573	0.70375	3.426	14.63	0.1418	0.512809		5.68			Hou 2006
38	Qi’eshan Group	andesite	336.9	0.03808	931.4	0.0012	0.703538	0.70353	3.318	12.85	0.1564	0.512848		5.82			Hou 2006
39	Qi’eshan Group	basalt	336.9	1.155	915.4	0.0036	0.703675	0.70366	3.901	15.36	0.1537	0.512852		6.01			Hou 2006
Western segment
1	Xiaorequanzi Formation	rhyolite	343	85.778	37.176	6.69133	0.731204	0.698448	10.104	42.055	0.14526	0.512942	0.512615	8.19657	463.998	387.335	this study
2	Xiaorequanzi Formation	rhyolite	343	31.839	582.795	0.158287	0.721826	0.721051	4.639	20.966	0.133776	0.512929	0.512628	8.44761	422.218	384.763	this study
3	Xiaorequanzi Formation	rhyolite	343	118.333	47.87	7.16914	0.731815	0.69672	11.359	48.875	0.140515	0.512924	0.512608	8.05375	471.452	406.389	this study
4	Xiaorequanzi Formation	basaltic andesite	345								0.136	0.51295		8.77			Xia et al. 2004
5	Xiaorequanzi	monzogranite	333	66.005	208.281	0.91692	0.707764	0.703418	4.942	25.028	0.119382	0.512869	0.512609	8.08	454.9	451.2	this study
6	Xiaorequanzi	monzogranite	333	72.837	178.251	1.18246	0.709209	0.703604	5.14	27.033	0.114956	0.51287	0.512619	8.28	433	440.6	this study
7	Xiaorequanzi	Moyite	343.6	66.5	79.41	2.42448	0.714085	0.702227	6.189	27.57	0.135723	0.512934	0.512629	8.46	423	380.7	this study
8	Xiaorequanzi	Moyite	343.6	64.943	93.44	2.01188	0.712452	0.702612	5.122	23.103	0.134042	0.512949	0.512647	8.83	385.3	353.4	this study
9	Xiaorequanzi	Moyite	343.6	63.782	75.861	2.43416	0.714016	0.70211	5.267	23.591	0.134986	0.512943	0.512639	8.67	401.6	364.9	this study
(87Sr/86Sr)i = (87Sr/86Sr)S-(87Rb/86Sr)S×(eλt-1);
(143Nd/144Nd)i = (143Nd/144Nd)S -(147Sm/144Nd)S×(eλt-1);
εNd(t) = ((143Nd/144Nd)S/(143Nd/144Nd)CHUR-1)×10000;
fSm/Nd = (147Sm/144Nd)S/(147Sm/144Nd)CHUR-1;
Where S= sample, t = age, (143Nd/144Nd)CHUR = 0.512638, (147Sm/144Nd)CHUR = 0.1967.
References:
Cao, R., 2012. The late Paleozoic tectonomagmatic evolution andmetallogenic response in the middle of Qoltagorogenic belt, Eastern Tianshan Mountains: Doctoral dissertation of China University of Geosciences (Wuhan) , p. 1–107 (in Chinese with English abstract).
Guo, J.W., 2021. Geochemical Characteristics of Ore-bearing Rocks and Genesis of Tuwudong Copper Deposit, Eastern Tianshan: Doctoral dissertation of China University of Geosciences (Beijing) , p. 1–69 (in Chinese with English abstract).
Hou, G.S., 2006. Geochemistry of Carboniferous volcanic rocks in the Jueluotag tectonic belt, East Tianshan: Doctoral dissertation of Institute of Geochemistry, Chinese Academy of Sciences, p. 1–94 (in Chinese with English abstract).
Li, X.M., Xia, L.Q., Xia, Z.H., Xu, X.Y., Ma, Z.P., Wang, D.L., 2004. Zircon U-Pb geochronology of volcanic rocks of the Qi'eshan Group in the East Tianshan Mountains: Regional Geology of China. v. 23, p. 1215–1220 (in Chinese with English abstract).
Rui, Z.Y., Zhang, L.S., Chen, Z.Y., Wang, L.S., Liu, Y.L., Wang, Y.T., 2004. Approach on source rock or source region of porphyry copper deposit: Acta Petrologica Sinica. v. 20, p. 229–238 (in Chinese with English abstract).
Wang, Y.H., Xue, C.J., Liu, J.J., Zhang, F.F., 2018. Origin of the subduction-related Carboniferous intrusions associated with the Yandong porphyry Cu deposit in eastern Tianshan, NW China: constraints from geology, geochronology, geochemistry, and Sr-Nd-Pb-Hf-O isotopes: Mineralium Deposita. v. 53, p. 629–647. doi: 10.1007/s00126-017-0763-3.
Xia, L.Q., Xu, X.Y., Xia, Z.C., Li, X.M., Ma, Z.P., Wang, L.S., 2004. Petrogenesis of carboniferous rift-related volcanic rocks in the Tianshan, Northwestern China: Geological Society of America Bulletin. v. 116, p. 419–433. doi: 10.1130/B25243.1.
Xiao, B., Chen, H.Y ., Hollings, P ., Han, J.S., Wang, Y .F., Y ang, J.T., Cai, K.D., 2017. Magmatic evolution of the Tuwu–Y andong porphyry Cu belt, NW China: Constraints from geochronology, geochemistry and Sr-Nd-Hf isotopes: Gondwana Research. v. 43, p. 74–93. doi: 10.1016/j.gr.2015.09.003.
Zhang, L.C., Xiao, W.J., Qin, K.Z., Zhang, Q., 2006. The adakite connection of the Tuwu-Y andong copper porphyry belt, eastern Tianshan, NW China: trace element and Sr–Nd–Pb isotope geochemistry: Mineralium Deposita. v. 41, p. 188–200. doi: 10.1007/s00126-006-0058-6.
